# Supplementary material for: Reasons for readmission in an underserved high-risk population: a qualitative analysis of a series of inpatient interviews
Source: PubMed Central journal article supplement — BMJ Open. 2013 Sep 19;3(9):e003212. doi: 10.1136/bmjopen-2013-003212 (PMC3780332; doi:10.1136/bmjopen-2013-003212), 2013-09-19
Supplement: bmjopen-2013-003212.draft_revisions.pdf [file bmjopen-2013-003212.draft_revisions.pdf]

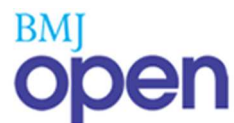

## Reasons for Readmission in a High-Risk Population

|                                 |                                                                                                                                                                                                             |
|---------------------------------|-------------------------------------------------------------------------------------------------------------------------------------------------------------------------------------------------------------|
| Journal:                        | <i>BMJ Open</i>                                                                                                                                                                                             |
| Manuscript ID:                  | bmjopen-2013-003212                                                                                                                                                                                         |
| Article Type:                   | Research                                                                                                                                                                                                    |
| Date Submitted by the Author:   | 13-May-2013                                                                                                                                                                                                 |
| Complete List of Authors:       | Long, Theodore; Yale School of Medicine, Internal Medicine<br>Genao, Ingina; Yale University School of Medicine, Internal Medicine<br>Horwitz, Leora; Yale University School of Medicine, Internal Medicine |
| <b>Primary Subject Heading</b>: | Qualitative research                                                                                                                                                                                        |
| Secondary Subject Heading:      | Health services research, Communication, General practice / Family practice                                                                                                                                 |
| Keywords:                       | Quality in health care < HEALTH SERVICES ADMINISTRATION & MANAGEMENT, PRIMARY CARE, QUALITATIVE RESEARCH                                                                                                    |
|                                 |                                                                                                                                                                                                             |

SCHOLARONE™  
Manuscripts

Peer Review Only

1  
2  
3 **Title:** Reasons for Readmission in a High-Risk Population  
4

5 **Authors:** Theodore Long, MD;<sup>1</sup> Inginia Genao, MD;<sup>2</sup> Leora I. Horwitz, MD, MHS<sup>2,3</sup>  
6  
7

8 **Running Title:** High-Risk Readmissions  
9

10 **Author affiliations:**

11  
12 <sup>1</sup>Internal Medicine Residency Program, Department of Internal Medicine, Yale School of  
13 Medicine, New Haven, CT  
14

15  
16 <sup>2</sup>Section of General Internal Medicine, Department of Internal Medicine, Yale School of  
17 Medicine, New Haven, CT  
18

19  
20 <sup>3</sup>Center for Outcomes Research and Evaluation, Yale-New Haven Hospital, New Haven, CT  
21  
22

23  
24 Corresponding author:

25 Theodore Long, MD

26 Yale Traditional Internal Medicine Residency Training Program

27 PO Box 208030

28 New Haven, CT 06520-8030

29 Tel: (203) 785-4123

30 Fax: (203) 785-7258

31 theodore.long@yale.edu  
32  
33  
34  
35  
36  
37

38 Word count: 3000

39 Tables: 1

40 Figures: 0

41 References: 22

42 Word count (abstract): 214

43  
44  
45  
46  
47  
48 Key words: access to care, care transitions, underserved populations, qualitative research,  
49 primary care  
50  
51  
52  
53  
54  
55  
56  
57  
58  
59  
60

## Abstract

Objective: To gather qualitative data to elucidate the reasons for readmissions in a high-risk population of underserved patients.

Design: We created an instrument with 27 open-ended questions based on current interventions.

Setting: Yale-New Haven Hospital.

Patients: Patients at the Yale Adult Primary Care Center (PCC).

Measurements: We conducted semi-structured qualitative interviews of patients who had four or more admissions in the previous six months and were currently readmitted to the hospital.

Results: We completed 17 interviews and identified themes relating to risk of readmission. We found that patients went directly to the Emergency Department (ED) when they experienced a change in health status without contacting their primary provider. Reasons for this included poor telephone or urgent care access and the belief that the PCC could not treat acute illness. Many patients could not name their primary provider. Conversely, every patient except one reported being able to obtain medications without undue financial burden, and every patient reported receiving adequate home care services.

Conclusions: These high-risk patients were receiving the formal services that they needed, but were making the decision to go to the ED because of inadequate access to care and fragmented primary care relationships. Formal transitional care services are unlikely to be adequate in reducing readmissions without also addressing primary care access and continuity.

## Article Summary

### Article Focus:

- We asked the question of what unique factors were contributing to readmissions in a high-risk urban underserved population
- We explored patient perceptions of areas of current interventions, including home services, medications, and transportation
- We propose interventions based on our findings, and compare our results to other studies looking at readmissions

### Key Messages:

- We found that there are factors contributing to readmissions that are not addressed by current intervention strategies
- In our high-risk population, there was a lack of primary care relationship and a tendency to delay seeking care that resulted in patients triaging themselves to the Emergency Department

### Strengths and Limitations of this Study:

- Limitations include this being a single site study with a focus on patients at the highest risk of readmission; thus findings may not be comparable to other populations
- Strengths include elucidating the perspectives of an underrepresented population of patients and defining key areas for intervention in this population

## Introduction

Hospital readmissions represent a significant cost to the healthcare system and are a burden to patients. Nationally, 19.6% of Medicare beneficiaries discharged from the hospital are readmitted within 30 days and 34.0% are readmitted within 90 days.<sup>1</sup> Many attempts have been made to identify and address the issues leading to readmission. However, no single strategy has been found to reproducibly reduce readmissions.<sup>2</sup> Most studies evaluating this problem have focused on chart review and administrative data, but there is a paucity of qualitative information from the perspectives of patients.<sup>3</sup> It has been unclear what happens to patients once they are discharged from the hospital, and what elements of their outpatient health care are inadequate in preventing hospital readmissions.

This study examined patient experiences after hospital discharge by conducting qualitative interviews of high-risk patients during readmission. We studied the urban underserved population of patients at Yale-New Haven Hospital (YNHH) with the highest incidence of readmission. We chose to assess this population because the urban underserved comprise a disproportionate share of readmissions at many academic medical centers.<sup>4-7</sup> Furthermore, patients with low socioeconomic status have been shown to have a distinctly challenging experience transitioning from inpatient admission to home.<sup>8</sup>

We sought to understand the perspectives of underserved patients at the highest risk of readmission in order to determine how future interventions could be more effective for this population. We examined their transition of care from the hospital to home, focusing on how they interacted with the health system once they left the hospital and what factors drove them to be readmitted so frequently.

## Methods

### *Setting*

We focused our study on the underserved population at YNHH, a 966 bed urban academic medical center. We interviewed patients cared for at the Yale Adult Primary Care Center (PCC), which is a hospital-based clinic serving primarily the low-income residents of New Haven.

### *Study Cohort*

Our study population was comprised of PCC patients with four or more admissions in the past six months, which is one of YNHH's criteria for high risk. At the time of this study, less than 150 patients at YNHH met this high-risk criterion, and of these 25% were PCC patients. We arranged for our medical record system to send a daily email listing all patients designated as high-risk currently admitted at YNHH. The criteria for this designation are either four or more admissions in the past six months or a diagnosis of heart failure. From the daily list, we identified all patients who had an established primary care provider in the PCC as well as at least two completed clinic notes from the prior 12 months. We set out the requirement for at least two clinic notes to ensure that enrolled patients were actively followed by the PCC. We then restricted this group to patients who were currently readmitted within 30 days of their last date of discharge from YNHH. We conducted the study from October, 2011 to April, 2012. Twenty-one eligible patients were identified during the study period, and four declined.

### *Design*

We created an instrument with 27 open-ended questions based on areas targeted by current interventions as well as other qualitative studies looking at readmissions.<sup>3,9</sup> The instrument was then revised based on pilot interviews and feedback. The final questions in the

1  
2  
3 instrument included the areas of transportation, support systems, medications, formal services,  
4 health literacy, access to care, relationship with provider, communication with providers, and  
5 transitions of care (see Appendix 1 for list of questions). We also included screening for  
6 depression via the Patient Health Questionnaire-2 (PHQ-2)<sup>10</sup> and for unhealthy alcohol use via  
7 the National Institute on Alcohol Abuse and Alcoholism (NIAAA) recommended tool.<sup>11</sup> The  
8 IRB waived the written consent requirement due to the fact that no identifying information was  
9 used. Informed consent was obtained verbally from all study participants. One investigator (T.L.)  
10 conducted semi-structured interviews. The interviews were recorded and then transcribed by a  
11 subcontracted transcriber.

### 12 *Analysis*

13  
14 Three investigators (T.L., I.G., L.H.) independently generated codes from the primary  
15 transcriptions. The codes represented themes found in the data. The investigators initially coded  
16 the first four transcriptions independently and then reviewed the coding scheme and resolved  
17 discrepancies collaboratively. This process was repeated two more times, with all transcriptions  
18 being coded independently and then meeting to come to a group consensus. A final code list was  
19 developed using the constant comparative method.<sup>12</sup> The codes were organized into 11 main  
20 themes.

### 21 **Results**

22  
23 We completed 17 interviews (11 women, 6 men). Every patient except one screened  
24 negative for unhealthy alcohol use per the NIAAA tool and 47% had a positive screen for  
25 depression per the PHQ-2. We identified 11 themes (Table 1), and describe five relating to risk  
26 of readmission: lack of primary care relationship, self triage, formal services, informal support  
27  
28  
29  
30  
31  
32  
33  
34  
35  
36  
37  
38  
39  
40  
41  
42  
43  
44  
45  
46  
47  
48  
49  
50  
51  
52  
53  
54  
55  
56  
57  
58  
59  
60

1  
2  
3 systems, access to care. Overall, we found that while patients described receiving adequate  
4  
5 formal services, barriers in accessing care and disjointed primary care relationships led to  
6  
7 patients making their own triage decisions and seeking other support systems.  
8  
9

10  
11 **Table 1:** 11 Main Themes

|                                                     |
|-----------------------------------------------------|
| 12 Informal Support Systems                         |
| 13 Formal Services                                  |
| 14 Health Literacy                                  |
| 15 Access to Care                                   |
| 16 Lack of Primary Care Relationship                |
| 17 Self Triage                                      |
| 18 Patient Phone Call                               |
| 19 Discharge Planning                               |
| 20 Patient Characteristics                          |
| 21 Readmissions (same or different<br>22 complaint) |
| 23 Post-Discharge Course                            |

24  
25  
26  
27  
28  
29  
30  
31  
32  
33  
34  
35  
36  
37  
38  
39  
40  
41  
42 *Lack of Primary Care Relationship*

43  
44 Participants described a fragmented relationship with their providers. Nine patients were  
45  
46 able to name their primary provider, while seven patients were unable to. In terms of their  
47  
48 connection with their provider, many expressed concern: “I ain’t got no relationship. I don’t even  
49  
50 know the person. They don’t even know me. There was no relationship.”  
51  
52

53  
54 Patients further referred to provider turnover and large provider teams as deleterious to  
55  
56 developing a relationship with their providers. One patient explained: “Well, I hate that they  
57  
58  
59  
60



1  
2  
3 keep switching doctors. They can't really keep the same doctor because as soon as you get  
4 comfortable with one person they'll let you know somebody else is there. Now it's like you got  
5 to learn this person all over. I hate changing doctors. I don't like that."  
6  
7  
8  
9

### 10 *Self Triage*

11  
12 We found that patients were typically going directly to the Emergency Department (ED)  
13 without contacting their primary care provider: "I could tell the pain, if it is severe enough to go  
14 to the PCC and sit around to be called in the clinic or do I need to just get out there and go right  
15 to the emergency room. So I could tell the difference, I learned to know my body now after  
16 getting so sick and the last three years I've been very sick."  
17  
18  
19  
20  
21  
22  
23

24 Patients commonly cited inability to reach their primary provider via telephone and the  
25 belief that the PCC could not treat acute illness as reasons for going directly to the ED. One  
26 patient explained that "I know that once I get there [to the PCC], they would send me anyway so  
27 I might just as well go to the [ED] first."  
28  
29  
30  
31  
32  
33

34 Finally, amongst patients who decided to go to the ED instead of going for an urgent  
35 primary care visit, a common theme was delaying action until the situation became more serious.  
36 One patient commented "I wait[ed] instead to get better [...] my head was pounding and when I  
37 walked to the bathroom I'd be staggering [...] I mashed my lifeline, and the ambulance picked  
38 me up."  
39  
40  
41  
42  
43  
44  
45

### 46 *Formal Services*

47  
48 We found that patients had limited or no difficulty accessing formal services such as  
49 medication assistance, home care, and transportation. All patients except one were able to obtain  
50 medications either despite financial barriers or with no financial barriers. One patient noted "I  
51 got medical and they basically pay for [medications]." Patients similarly found home care  
52  
53  
54  
55  
56  
57  
58  
59  
60

1  
2  
3 accessible, describing “Well, I have a nurse coming usually once a week and more often if there  
4 is something going on.” Formal transportation was obtained with minimal difficulty, with one  
5  
6 patient explaining “They have a car that gets me [...] I have to call and make an appointment and  
7  
8 they would call people telling them two days in advance.”  
9  
10  
11

### 12 *Informal Support Systems*

13  
14  
15 Despite the widespread availability and use of formal post-discharge support systems,  
16  
17 patients reported still relying heavily on informal support from friends and family members to  
18  
19 help with transportation and medication management. One patient described “So my daughter  
20  
21 sets them out now so it makes it easier for the visit nurse, so that’s how I manage my medication  
22  
23 at home. They put it in a little blue container and my daughter sets them up by the week.”  
24  
25

26  
27 Another patient commented “If I can’t move, my family give me a ride - my daughter, my man,  
28  
29 my niece, my nephew, my son.”  
30  
31

### 32 *Access to Care*

33  
34 The most commonly cited problem inhibiting patients from accessing medical care was  
35  
36 an impaired ability to speak to their provider on the telephone. This was described as both  
37  
38 difficulty in reaching someone on the phone as well as long waiting times before receiving a call  
39  
40 back from a provider. As one patient noted, “I don’t call primary care because it takes too long to  
41  
42 get through to anybody until you get the call – I could have gone on a trip to Europe and back.”  
43  
44

45  
46 Patients also noted that they had stopped even trying to call based on prior experiences:  
47  
48 “I try to call the Primary Care Center. But it’s like that one time that took 7 hours. I haven’t  
49  
50 called them [since]. So it’s like either I stick it out and let the pain or whatever subside, or I go  
51  
52 down to the ER. If I called them one time and it took them some hours to get back to me, I feel  
53  
54 that it’s useless if I call again.”  
55  
56  
57  
58  
59  
60

## Discussion

1  
2  
3  
4  
5  
6  
7  
8  
9  
10  
11  
12  
13  
14  
15  
16  
17  
18  
19  
20  
21  
22  
23  
24  
25  
26  
27  
28  
29  
30  
31  
32  
33  
34  
35  
36  
37  
38  
39  
40  
41  
42  
43  
44  
45  
46  
47  
48  
49  
50  
51  
52  
53  
54  
55  
56  
57  
58  
59  
60

In this study of underserved patients with a high frequency of hospital readmissions, we found that there may be factors contributing to readmissions that are not addressed by most current interventions, which typically target access to formal outpatient services.<sup>3,13,14</sup> Contrary to our expectations, patients did not have difficulty accessing medications, home care, or transportation. Rather, the primary factors contributing to readmissions that were consistently brought up by patients in our study were self triage to the ED and a lack of primary care relationship.

While other studies have examined the challenges in transitions from inpatient care,<sup>8</sup> we explored how patients were interacting with the health system when they were home. We found that patients were delaying care and then making the decision to go to the ED without attempting to contact their primary providers. This delay of care likely resulted in a worsening of their health status which consequently precipitated another hospital admission. The most consistent reasons for not reaching out to their primary providers were inability to speak with a provider on the phone, the belief that their primary care provider could not manage urgent issues, and patient perception that their primary care provider could not address their concerns in a timely manner.

Our results differ from other qualitative studies evaluating readmissions. In a recent article by Strunin et al (2007), patients expressed that they had inadequate medical care at home and lacked transportation to appointments.<sup>3</sup> In contrast, we found that these needs were being met for our high-risk patients. Similarly, a recent survey by Kangovi et al (2012) of patients that had been readmitted found that lack of medication adherence after discharge was commonly attributed to difficulty paying for medications and obtaining transportation.<sup>8</sup> In our sample of patients, only one patient reported not being able to obtain medications due to cost. Although

1  
2  
3 other studies have included patients with one or more readmission within 30 days of discharge,  
4  
5 we utilized more stringent enrollment criteria, requiring patients to have had four or more  
6  
7 admissions in the prior six months. The high-risk underserved patients that we enrolled likely  
8  
9 had more interaction with the health system than other patients with fewer hospital admissions,  
10  
11 and therefore more opportunity to be linked in with formal services such as VNA and arranged  
12  
13 transportation. Thus our findings suggest that this population of patients needs more targeted  
14  
15 interventions to address the consistently stated problems of self triage and a lack of primary care  
16  
17 relationship.  
18  
19  
20

21  
22 First, it is critical to have easy telephone access to primary care offices, as this is the  
23  
24 preferred method of communication for patients and is linked to improved patient outcomes.<sup>15-17</sup>  
25  
26 Inadequate telephone access contributes to patients having difficulty obtaining urgent care when  
27  
28 they have a change in health status. An effective telephone system would triage urgent issues,  
29  
30 and would ensure that a member of the patient's provider team is available to field urgent calls.  
31  
32 Patients in our study commonly mentioned that they wanted to receive a timely call back for  
33  
34 urgent issues. Several strategies exist to improve telephone access. Open access scheduling,  
35  
36 which minimizes scheduled appointments to maximize same-day visit availability, typically also  
37  
38 improves telephone access by opening up the calendar and streamlining the types of  
39  
40 appointments that can be made. The time taken per call is consequently shorter.<sup>18,19</sup>  
41  
42 Alternatively, many new electronic medical record systems allow secure messaging through the  
43  
44 electronic medical record. This feature provides an alternative method of communication for  
45  
46 patients, thereby reducing demand for telephone access, and facilitating timely responses to  
47  
48 urgent calls.<sup>20</sup>  
49  
50  
51  
52  
53

54  
55 Second, many patients in our study had stopped calling their primary care provider  
56  
57  
58  
59  
60

1  
2  
3 because of their perceptions of the primary care clinic as incapable of handling acute medical  
4 concerns. Patient experiences, such as being transferred from their primary care office to the ED,  
5 shaped their perception of the primary care clinic. We would suggest educating patients about  
6 the scope of their primary care clinics as urgent care centers, as well as the role of their primary  
7 providers in their care when they have a change in their health status. In addition, providers  
8 should discuss their role in helping patients make triage decisions when they get sick at home.  
9

10  
11  
12  
13  
14  
15  
16  
17  
18 Third, patient-provider continuity is essential and has been consistently associated with  
19 improved patient outcomes and satisfaction.<sup>21,22</sup> To address the lack of primary care relationship  
20 that patients described, there must first be a system in place that enables patients to have  
21 continuity with their teams when they have a change in their health status. This is especially  
22 difficult in clinics staffed by residents who are present one half day per week, which is a  
23 common model for internal medicine residency programs. When patients have urgent issues that  
24 arise, they are often seen by providers who are not part of their primary care team. A strategy for  
25 improving upon this situation would be to arrange residents into practice-partner teams where  
26 they would work together to care for a larger panel of patients. Residents would rotate  
27 ambulatory blocks such that a member of the team would be in clinic daily for the duration of an  
28 outpatient block to handle urgent issues that arise for any patient on the team panel. The patients  
29 would be well-known to a small group of rotating residents. While the patients would still need  
30 to become familiar with a team of resident physicians, this has the potential to make patients feel  
31 more comfortable seeking care for acute issues. This team-based care would also aid in the  
32 conversion of primary care clinics to patient-centered medical homes, where continuity is an  
33 essential tenet.  
34  
35  
36  
37  
38  
39  
40  
41  
42  
43  
44  
45  
46  
47  
48  
49  
50  
51  
52  
53

54  
55  
56 Our study has several limitations. First, we focused on an underserved population; our  
57  
58  
59  
60

1  
2  
3 results may not apply to other populations. Second, our sample size is small, though we did  
4  
5 employ a comprehensive strategy to identify patients meeting our enrollment criteria during the  
6  
7 study period, and we did reach theoretical saturation as evidenced by no new themes being  
8  
9 introduced in the final interviews. Third, we conducted our study at a single site, and there may  
10  
11 be other factors more prevalent at other sites contributing to readmission.  
12  
13

14  
15 In summary, we found that even though patients were receiving the formal services that  
16  
17 they needed, they were still being driven to make the decision to go to the ED based on based on  
18  
19 long phone wait times for primary care and their belief or experience that primary care cannot  
20  
21 treat their acute problems. We propose that educating patients about the capability and role of the  
22  
23 primary care provider while concurrently streamlining telephone access to providers could  
24  
25 enhance continuity and thereby prevent readmissions. Focusing entirely on arranging formal  
26  
27 transitional care services, such as transportation and medications, is unlikely to be adequate in  
28  
29 reducing readmissions.  
30  
31  
32  
33  
34  
35  
36  
37  
38  
39  
40  
41  
42  
43  
44  
45  
46  
47  
48  
49  
50  
51  
52  
53  
54  
55  
56  
57  
58  
59  
60

## Acknowledgements

*Funders:* Dr. Horwitz is supported by the National Institute on Aging (K08 AG038336) and by the American Federation for Aging Research through the Paul B. Beeson Career Development Award Program. This work was also supported by a grant from the Claude D. Pepper Older Americans Independence Center at Yale University School of Medicine (P30AG021342 NIH/NIA). No funding source had any role in the study design; in the collection, analysis, and interpretation of data; in the writing of the report; or in the decision to submit the article for publication. The content is solely the responsibility of the authors and does not necessarily represent the official views of the National Institute on Aging, the National Institutes of Health, or the American Federation for Aging Research.

*Access to data:* Leora Horwitz had full access to all of the data in the study and takes responsibility for the integrity of the data and the accuracy of the data analysis.

*Prior presentations:* An earlier version of this work was presented as an oral presentation at the Society of General Internal Medicine Annual Meeting in Orlando, FL on May 12, 2012.

*Conflicts of interest:* The authors have no conflicts of interest to report.

*Contributorship:* The three authors are justifiably credited with authorship, according to the authorship criteria of ICMJE guidelines. Theodore Long: project management, conception, design, analysis and interpretation of data, drafting of the manuscript, final approval given; all remaining authors: conception and design, analysis, critical revision of manuscript, final approval given.

## References

1. Jencks SF, Williams MV, Coleman EA. Rehospitalizations among patients in the Medicare fee-for-service program. *N Engl J Med*. 2009;360(14):1418-1428.
2. Hansen LO, Young RS, Hinami K, et al. Interventions to reduce 30-day rehospitalization: a systematic review. *Ann Intern Med*. 2011;155(8):520-528.
3. Strunin L, Stone M, Jack B. Understanding rehospitalization risk: can hospital discharge be modified to reduce recurrent hospitalization? *J Hosp Med*. 2007;2(5):297-304.
4. Weissman JS, Stern RS, Epstein AM. The impact of patient socioeconomic status and other social factors on readmission: a prospective study in four Massachusetts hospitals. *Inquiry*. 1994;31(2):163-172.
5. Billings J, Zeitel L, Lukomnik J, et al. Impact of socioeconomic status on hospital use in New York City. *Health Aff (Millwood)*. 1993;12(1):162-173.
6. Kalra AD, Fisher RS, Axelrod P. Decreased length of stay and cumulative hospitalized days despite increased patient admissions and readmissions in an area of urban poverty. *J Gen Intern Med*. 2010;25(9):930-935.
7. Allaudeen N, Vidyarthi A, Maselli J, et al. Redefining readmission risk factors for general medicine patients. *J Hosp Med*. 2011;6(2):54-60.
8. Kangovi S, Grande D, Meehan P, et al. Perceptions of readmitted patients on the transition from hospital to home. *J Hosp Med*. 2012;7(9):709-712.
9. Annema C, Luttik ML, Jaarsma T. Reasons for readmission in heart failure: Perspectives of patients, caregivers, cardiologists, and heart failure nurses. *Heart Lung*. 2009;38(5):427-434.
10. Kroenke K, Spitzer RL, Williams JB. The Patient Health Questionnaire-2: validity of a two-item depression screener. *Med Care*. 2003;41(11):1284-1292.
11. Smith PC, Schmidt SM, Allensworth-Davies D, et al. Primary care validation of a single-question alcohol screening test. *J Gen Intern Med*. 2009;24(7):783-788.
12. Glaser BG, Strauss AL. *The Discovery of Grounded Theory: Strategies for Qualitative Research*. New York: Aldine; 1967.
13. Boling PA. Care transitions and home health care. *Clin Geriatr Med*. 2009;25(1):135-148, viii.
14. Pearson S, Inglis SC, McLennan SN, et al. Prolonged effects of a home-based intervention in patients with chronic illness. *Arch Intern Med*. 2006;166(6):645-650.
15. LaVela SL, Schectman G, Gering J, et al. Understanding health care communication preferences of veteran primary care users. *Patient Educ Couns*. 2012;88(3):420-426.
16. Wasson J, Gaudette C, Whaley F, et al. Telephone care as a substitute for routine clinic follow-up. *JAMA*. 1992;267(13):1788-1793.
17. Curry SJ, McBride C, Grothaus LC, et al. A randomized trial of self-help materials, personalized feedback, and telephone counseling with nonvolunteer smokers. *J Consult Clin Psychol*. 1995;63(6):1005-1014.
18. Steinbauer JR, Korell K, Erdin J, et al. Implementing open-access scheduling in an academic practice. *Fam Pract Manag*. 2006;13(3):59-64.
19. Rose KD, Ross JS, Horwitz LI. Advanced access scheduling outcomes: a systematic review. *Arch Intern Med*. 2011;171(13):1150-1159.
20. Zhou YY, Garrido T, Chin HL, et al. Patient access to an electronic health record with secure messaging: impact on primary care utilization. *Am J Manag Care*. 2007;13(7):418-424.



- 1
  - 2
  - 3
  - 4
  - 5
  - 6
  - 7
  - 8
  - 9
  - 10
  - 11
  - 12
  - 13
  - 14
  - 15
  - 16
  - 17
  - 18
  - 19
  - 20
  - 21
  - 22
  - 23
  - 24
  - 25
  - 26
  - 27
  - 28
  - 29
  - 30
  - 31
  - 32
  - 33
  - 34
  - 35
  - 36
  - 37
  - 38
  - 39
  - 40
  - 41
  - 42
  - 43
  - 44
  - 45
  - 46
  - 47
  - 48
  - 49
  - 50
  - 51
  - 52
  - 53
  - 54
  - 55
  - 56
  - 57
  - 58
  - 59
  - 60
21. Wasson JH, Sauvigne AE, Mogielnicki RP, et al. Continuity of outpatient medical care in elderly men. A randomized trial. *JAMA*. 1984;252(17):2413-2417.
22. van Walraven C, Oake N, Jennings A, et al. The association between continuity of care and outcomes: a systematic and critical review. *J Eval Clin Pract*. 2010;16(5):947-956.

For peer review only

1  
2  
3 **Appendix 1:** List of questions from interview instrument  
4

5 Tell me what happened to you since you went home between last discharge and now?  
6

7  
8 Do you think there is anything else that could have been done to have prevented you from  
9 coming back to hospital, and if so what?  
10

11 When you have a change in your health at home, or start to feel sick at home, how do you make  
12 the decision to try to reach your PMD versus going to the ED?  
13

14  
15 How often do you try to reach your PMD as opposed to going to the ED?  
16

17  
18 When you have a change in your health at home, or start to feel sick at home, how long have you  
19 waited in the past before contacting your provider?  
20

21 Can you tell me about the medications you take at home?  
22

23  
24 Has a financial barrier or problem ever resulted in you not being able to obtain the medications  
25 that you need? If so, tell me about it. Has this been a common problem for you?  
26

27 How do you manage your medications at home?  
28

29 Do you have any difficulty with your medications?  
30

31 Tell me what it's like at home for you?  
32

33  
34 Do you have people who can help you at home?  
35

36 Do you feel safe at home?  
37

38  
39 How do you think of the social support you have at home?  
40

41 What is your financial situation?  
42

43  
44 In what ways do you have difficulty getting to and from your primary care appointments, if at  
45 all?  
46

47 How do you get around?  
48

49 In the last couple of weeks, have you been feeling depressed?  
50

51  
52 Have you ever been on any medications for depression?  
53

54 Do you feel like these feelings of depression have caused you to have to come to hospital more  
55 than you otherwise would have to?  
56  
57  
58  
59  
60

1  
2  
3 What's your relationship with your primary doctor at the Primary Care Center?  
4

5  
6 Do you know the name of your PMD, and do you have difficulty reaching your primary doctor if  
7 you're having a problem?  
8

9  
10 How can your primary doctor help to prevent you from having to be readmitted to the hospital do  
11 you think?  
12

13  
14 Can you think of anything more your primary doctor, or the Primary Care Center here at Yale  
15 could do?  
16

17  
18 What do you think are some other things that can be done to help prevent you from having to  
19 come back to the hospital, if anything?  
20

21  
22 Is there anything else that you think that either you or the physicians in the community could do  
23 to help you with that?  
24

25  
26 Do you need any more home support (home nursing care, VNA, etc) than you currently are  
27 receiving?  
28

29  
30 Finally, do you think it would be helpful for your primary doctor to call you at home to check in  
31 with you on a regular basis, and why?  
32  
33  
34  
35  
36  
37  
38  
39  
40  
41  
42  
43  
44  
45  
46  
47  
48  
49  
50  
51  
52  
53  
54  
55  
56  
57  
58  
59  
60

## Consolidated criteria for reporting qualitative studies (COREQ): 32-item checklist

| No                                             | Item                                     | Guide questions/description                                                                                                                                                                                                   |
|------------------------------------------------|------------------------------------------|-------------------------------------------------------------------------------------------------------------------------------------------------------------------------------------------------------------------------------|
| <b>Domain 1: Research team and reflexivity</b> |                                          |                                                                                                                                                                                                                               |
| Personal Characteristics                       |                                          |                                                                                                                                                                                                                               |
| 1.                                             | Interviewer/facilitator                  | Which author/s conducted the interview or focus group?<br>Theodore Long                                                                                                                                                       |
| 2.                                             | Credentials                              | What were the researcher's credentials? <i>E.g. PhD, MD</i><br>MD                                                                                                                                                             |
| 3.                                             | Occupation                               | What was their occupation at the time of the study?<br>Internal Medicine resident                                                                                                                                             |
| 4.                                             | Gender                                   | Was the researcher male or female?<br>Male                                                                                                                                                                                    |
| 5.                                             | Experience and training                  | What experience or training did the researcher have?<br>Researcher received training from both Dr. Horwitz, who has extensive experience with qualitative interviewing, as well as relevant textbooks on qualitative studies. |
| Relationship with participants                 |                                          |                                                                                                                                                                                                                               |
| 6.                                             | Relationship established                 | Was a relationship established prior to study commencement?<br>No                                                                                                                                                             |
| 7.                                             | Participant knowledge of the interviewer | What did the participants know about the researcher? <i>e.g. personal goals, reasons for doing the research</i><br>Participants knew that the researcher was conducting interviews for the purpose of this research study.    |
| 8.                                             | Interviewer characteristics              | What characteristics were reported about the interviewer/facilitator? <i>e.g. Bias, assumptions, reasons and interests in the research topic</i><br>Researcher stated interest in research topic.                             |
| <b>Domain 2: study design</b>                  |                                          |                                                                                                                                                                                                                               |
| Theoretical framework                          |                                          |                                                                                                                                                                                                                               |
| 9.                                             | Methodological orientation and Theory    | What methodological orientation was stated to underpin the study? <i>e.g. grounded theory, discourse analysis, ethnography, phenomenology, content analysis</i><br>Grounded theory                                            |
| Participant selection                          |                                          |                                                                                                                                                                                                                               |
| 10.                                            | Sampling                                 | How were participants selected? <i>e.g. purposive, convenience, consecutive, snowball</i><br>Purposive                                                                                                                        |
| 11.                                            | Method of approach                       | How were participants approached? <i>e.g. face-to-face, telephone, mail, email</i><br>Face-to-face                                                                                                                            |
| 12.                                            | Sample size                              | How many participants were in the study?<br>17                                                                                                                                                                                |
| 13.                                            | Non-participation                        | How many people refused to participate or dropped out? Reasons?<br>4 patients refused, stating that they were not interested in                                                                                               |

| No  | Item                                   | Guide questions/description                                                                                                                                                         |
|-----|----------------------------------------|-------------------------------------------------------------------------------------------------------------------------------------------------------------------------------------|
|     |                                        | participating                                                                                                                                                                       |
|     | Setting                                |                                                                                                                                                                                     |
| 14. | Setting of data collection             | Where was the data collected? e.g. <i>home, clinic, workplace</i><br>Workplace                                                                                                      |
| 15. | Presence of non-participants           | Was anyone else present besides the participants and researchers?<br>No                                                                                                             |
| 16. | Description of sample                  | What are the important characteristics of the sample? e.g. <i>demographic data, date</i><br>No identifying information was used, we only used status as a primary care patient      |
|     | Data collection                        |                                                                                                                                                                                     |
| 17. | Interview guide                        | Were questions, prompts, guides provided by the authors?<br>Was it pilot tested?<br>The interview guide was iterative and tested through evaluating interviews sequentially.        |
| 18. | Repeat interviews                      | Were repeat interviews carried out? If yes, how many?<br>No                                                                                                                         |
| 19. | Audio/visual recording                 | Did the research use audio or visual recording to collect the data?<br>We used an audio recording device                                                                            |
| 20. | Field notes                            | Were field notes made during and/or after the interview or focus group?<br>No                                                                                                       |
| 21. | Duration                               | What was the duration of the interviews or focus group?<br>15 to 20 minutes per interview                                                                                           |
| 22. | Data saturation                        | Was data saturation discussed?<br>Yes, we felt that we reached theoretical saturation                                                                                               |
| 23. | Transcripts returned                   | Were transcripts returned to participants for comment and/or correction?<br>No                                                                                                      |
|     | <b>Domain 3: analysis and findings</b> |                                                                                                                                                                                     |
|     | Data analysis                          |                                                                                                                                                                                     |
| 24. | Number of data coders                  | How many data coders coded the data?<br>Three                                                                                                                                       |
| 25. | Description of the coding tree         | Did authors provide a description of the coding tree?<br>Yes                                                                                                                        |
| 26. | Derivation of themes                   | Were themes identified in advance or derived from the data?<br>Derived from data                                                                                                    |
| 27. | Software                               | What software, if applicable, was used to manage the data?<br>None                                                                                                                  |
| 28. | Participant checking                   | Did participants provide feedback on the findings?<br>No                                                                                                                            |
|     | Reporting                              |                                                                                                                                                                                     |
| 29. | Quotations presented                   | Were participant quotations presented to illustrate the themes / findings? Was each quotation identified? e.g. <i>participant number</i><br>Quotations were used but not identified |
| 30. | Data and findings consistent           | Was there consistency between the data presented and the findings?                                                                                                                  |

1  
2  
3  
4  
5  
6  
7  
8  
9  
10  
11  
12  
13  
14  
15  
16  
17  
18  
19  
20  
21  
22  
23  
24  
25  
26  
27  
28  
29  
30  
31  
32  
33  
34  
35  
36  
37  
38  
39  
40  
41  
42  
43  
44  
45  
46  
47  
48  
49  
50  
51  
52  
53  
54  
55  
56  
57  
58  
59  
60

| No  | Item                    | Guide questions/description                                            |
|-----|-------------------------|------------------------------------------------------------------------|
|     |                         | Yes                                                                    |
| 31. | Clarity of major themes | Were major themes clearly presented in the findings?<br>Yes            |
|     |                         | Is there a description of diverse cases or discussion of minor themes? |
| 32. | Clarity of minor themes | Yes                                                                    |

For peer review only

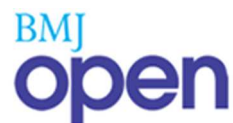

**Reasons for readmission in an underserved high-risk population: A qualitative analysis of a series of inpatient interviews**

|                                 |                                                                                                                                                                                                             |
|---------------------------------|-------------------------------------------------------------------------------------------------------------------------------------------------------------------------------------------------------------|
| Journal:                        | <i>BMJ Open</i>                                                                                                                                                                                             |
| Manuscript ID:                  | bmjopen-2013-003212.R1                                                                                                                                                                                      |
| Article Type:                   | Research                                                                                                                                                                                                    |
| Date Submitted by the Author:   | 09-Jul-2013                                                                                                                                                                                                 |
| Complete List of Authors:       | Long, Theodore; Yale School of Medicine, Internal Medicine<br>Genao, Ingina; Yale University School of Medicine, Internal Medicine<br>Horwitz, Leora; Yale University School of Medicine, Internal Medicine |
| <b>Primary Subject Heading</b>: | Qualitative research                                                                                                                                                                                        |
| Secondary Subject Heading:      | Health services research, Communication, General practice / Family practice                                                                                                                                 |
| Keywords:                       | Quality in health care < HEALTH SERVICES ADMINISTRATION & MANAGEMENT, PRIMARY CARE, QUALITATIVE RESEARCH                                                                                                    |
|                                 |                                                                                                                                                                                                             |

SCHOLARONE™  
Manuscripts

**Title:** Reasons for readmission in an underserved high-risk population: A qualitative analysis of a series of inpatient interviews

**Authors:** Theodore Long, MD;<sup>1</sup> Inginia Genao, MD;<sup>2</sup> Leora I. Horwitz, MD, MHS<sup>2,3</sup>

**Running Title:** High-Risk Readmissions

**Author affiliations:**

<sup>1</sup>Internal Medicine Residency Program, Department of Internal Medicine, Yale School of Medicine, New Haven, CT

<sup>2</sup>Section of General Internal Medicine, Department of Internal Medicine, Yale School of Medicine, New Haven, CT

<sup>3</sup>Center for Outcomes Research and Evaluation, Yale-New Haven Hospital, New Haven, CT

Corresponding author:

Theodore Long, MD

Yale Traditional Internal Medicine Residency Training Program

PO Box 208030

New Haven, CT 06520-8030

Tel: (203) 785-4123

Fax: (203) 785-7258

theodore.long@yale.edu

Word count: 3347

Tables: 1

Figures: 0

References: 26

Word count (abstract): 214

Key words: access to care, care transitions, underserved populations, qualitative research, primary care



## Abstract

Objective: To gather qualitative data to elucidate the reasons for readmissions in a high-risk population of underserved patients.

Design: We created an instrument with 27 open-ended questions based on current interventions.

Setting: Yale-New Haven Hospital.

Patients: Patients at the Yale Adult Primary Care Center (PCC).

Measurements: We conducted semi-structured qualitative interviews of patients who had four or more admissions in the previous six months and were currently readmitted to the hospital.

Results: We completed 17 interviews and identified themes relating to risk of readmission. We found that patients went directly to the Emergency Department (ED) when they experienced a change in health status without contacting their primary provider. Reasons for this included poor telephone or urgent care access and the belief that the PCC could not treat acute illness. Many patients could not name their primary provider. Conversely, every patient except one reported being able to obtain medications without undue financial burden, and every patient reported receiving adequate home care services.

Conclusions: These high-risk patients were receiving the formal services that they needed, but were making the decision to go to the ED because of inadequate access to care and fragmented primary care relationships. Formal transitional care services are unlikely to be adequate in reducing readmissions without also addressing primary care access and continuity.

## Article Summary

### Article Focus:

- We asked the question of what unique factors were contributing to readmissions in a high-risk urban underserved population
- We explored patient perceptions of areas of current interventions, including home services, medications, and transportation
- We propose interventions based on our findings, and compare our results to other studies looking at readmissions

### Key Messages:

- We found that there are factors contributing to readmissions that are not addressed by current intervention strategies
- In our high-risk population, there was a lack of primary care relationship and a tendency to delay seeking care that resulted in patients triaging themselves to the Emergency Department

### Strengths and Limitations of this Study:

- Limitations include this being a single site study with a focus on patients at the highest risk of readmission; thus findings may not be comparable to other populations
- Strengths include elucidating the perspectives of an underrepresented population of patients and defining key areas for intervention in this population

## Introduction

Hospital readmissions represent a significant cost to the healthcare system and are a burden to patients. Nationally, 19.6% of Medicare beneficiaries discharged from the hospital are readmitted within 30 days and 34.0% are readmitted within 90 days [1]. Many attempts have been made to identify and address the issues leading to readmission. However, no single strategy has been found to reproducibly reduce readmissions [2]. Most studies evaluating this problem have focused on chart review and administrative data, but there is a paucity of qualitative information from the perspectives of patients [3]. It has been unclear what happens to patients once they are discharged from the hospital, and whether their health care outside of the hospital could be improved in order to prevent hospital readmissions.

This study examined patient experiences after hospital discharge by conducting qualitative interviews of high-risk patients during readmission. We studied the urban underserved population of patients at Yale-New Haven Hospital (YNHH) with the highest incidence of readmission. We chose to assess this population because the urban underserved comprise a disproportionate share of readmissions at many academic medical centers [4-7]. Furthermore, patients with low socioeconomic status have been shown to have a distinctly challenging experience transitioning from inpatient admission to home [8-10].

We sought to understand the perspectives of underserved patients at the highest risk of readmission in order to determine how future interventions could be more effective for this population. We examined their transition of care from the hospital to home, focusing on how they interacted with the health system once they left the hospital and what factors drove them to be readmitted so frequently.

## Methods

### *Setting*

We focused our study on the underserved population at YNHH, a 966 bed urban academic medical center. We interviewed patients cared for at the Yale Adult Primary Care Center (PCC), which is a hospital-based clinic serving primarily the low-income residents of New Haven. The PCC is staffed by internal medicine residents who are typically present for one half day per week as well as part and full time attending providers. Residents are assigned to the PCC for their entire three years of training.

### *Study Cohort*

Our study population was comprised of PCC patients with four or more admissions in the past six months, which is one of YNHH's criteria for high risk. At the time of this study, less than 150 patients at YNHH met this high-risk criterion, and of these 25% were PCC patients. We arranged for our medical record system to send a daily email listing all patients designated as high-risk currently admitted at YNHH. The criteria for this designation are either four or more admissions in the past six months or a diagnosis of heart failure. From the daily list, we identified patients who had four or more admissions in the past six months and who had an established primary care provider in the PCC as well as at least two completed clinic notes from the prior 12 months. We set out the requirement for at least two clinic notes to ensure that enrolled patients were actively followed by the PCC. We then restricted this group to patients who were currently readmitted within 30 days of their last date of discharge from YNHH. All interviews were conducted inpatient during the patients' readmission stays. We completed the study from October, 2011 to April, 2012. Interviews were completed on both weekdays and weekends. Twenty-one eligible patients were identified during the study period, and four

1  
2  
3 declined.  
4  
5

6 *Design*  
7

8 We created an instrument with 27 open-ended questions based on areas targeted by  
9  
10 current interventions as well as other qualitative studies looking at readmissions [3, 11]. We then  
11  
12 conducted pilot interviews and solicited feedback about the interview questions from patients.  
13  
14 The instrument was revised based on this feedback. We also extensively reviewed the first  
15  
16 complete interview transcription, and further revised the instrument based on this feedback as  
17  
18 well. The final questions in the instrument included the areas of transportation, support systems,  
19  
20 medications, formal services, health literacy, access to care, relationship with provider,  
21  
22 communication with providers, and transitions of care (see Appendix 1 for list of questions). For  
23  
24 questions asking for an affirmative/negative or numerical response, we used a strategy of  
25  
26 planned prompts and probes to extend the narrative. We also included screening for depression  
27  
28 via the Patient Health Questionnaire-2 (PHQ-2) [12] and for unhealthy alcohol use via the  
29  
30 National Institute on Alcohol Abuse and Alcoholism (NIAAA) recommended tool [13]. The IRB  
31  
32 waived the written consent requirement due to the fact that no identifying information was used.  
33  
34 Informed consent was obtained verbally from all study participants. One investigator (T.L.)  
35  
36 conducted semi-structured interviews. The interviews were recorded and then transcribed by a  
37  
38 subcontracted transcriber.  
39  
40  
41  
42  
43  
44

45 *Analysis*  
46

47  
48 Three investigators (T.L., I.G., L.H.) independently generated codes from the primary  
49  
50 transcriptions. The codes represented themes found in the data. The investigators initially coded  
51  
52 the first four transcriptions independently and then reviewed the coding scheme and resolved  
53  
54 discrepancies collaboratively. The transcriptions were saved as Microsoft Word documents, with  
55  
56  
57  
58  
59  
60

1  
2  
3 codes being tracked as Comments within these documents. This process was repeated two more  
4  
5 times, with all transcriptions being coded independently and then meeting to come to a group  
6  
7 consensus. It was decided ahead of time that transcriptions would be coded until theoretical  
8  
9 saturation was reached and no new codes were being introduced in the interviews. A final code  
10  
11 list was developed using the constant comparative method [14]. The codes were organized into  
12  
13  
14  
15 11 main themes.

## 20 Results

21  
22 We completed 17 interviews (11 women, 6 men). On average, the interviews were 15 to  
23  
24 20 minutes long. Every patient except one screened negative for unhealthy alcohol use per the  
25  
26 NIAAA tool and 47% had a positive screen for depression per the PHQ-2. We identified 11  
27  
28 themes (Table 1), and describe five relating to risk of readmission: fragmented primary care  
29  
30 relationships contributing to avoidance of ambulatory care, self triage leading to potentially  
31  
32 avoidable ED use, adequacy of formal services, heavy reliance on informal support systems,  
33  
34 inadequate access to care. The codes contributing to these five themes were consistent  
35  
36 throughout the interviews and pertained to either reasons for readmission or current interventions  
37  
38 targeted at decreasing readmissions. The other themes represented self-reported descriptions,  
39  
40 such as substance abuse for the theme of patient characteristics. Overall, we found that while  
41  
42 patients described receiving adequate formal services, barriers in accessing care and disjointed  
43  
44 primary care relationships led to patients making their own triage decisions and seeking other  
45  
46 support systems.  
47  
48  
49  
50  
51

52  
53 **Table 1:** 11 Main Themes

54  
55  
56 

|                                    |
|------------------------------------|
| Heavy Reliance on Informal Support |
|------------------------------------|

  
57  
58  
59  
60

|                                                                                          |
|------------------------------------------------------------------------------------------|
| Systems                                                                                  |
| Adequacy of Formal Services                                                              |
| Health Literacy                                                                          |
| Inadequate Access to Care                                                                |
| Fragmented Primary Care Relationships<br>Contributing to Avoidance of<br>Ambulatory Care |
| Self Triage Leading to Potentially<br>Avoidable ED Use                                   |
| Patient Phone Call                                                                       |
| Discharge Planning                                                                       |
| Patient Characteristics                                                                  |
| Readmissions (same or different<br>complaint)                                            |
| Post-Discharge Course                                                                    |

### *Fragmented Primary Care Relationships Contributing to Avoidance of Ambulatory Care*

Participants described a fragmented relationship with their providers. Nine patients were able to name their primary provider, while seven patients were unable to. In terms of their connection with their provider, many expressed concern: “I ain’t got no relationship. I don’t even know the person. They don’t even know me. There was no relationship.”

Patients further referred to provider turnover and large provider teams as deleterious to developing a relationship with their providers. One patient explained: “Well, I hate that they keep switching doctors. They can’t really keep the same doctor because as soon as you get

1  
2  
3 comfortable with one person they'll let you know somebody else is there. Now it's like you got  
4  
5 to learn this person all over. I hate changing doctors. I don't like that." Another patient described  
6  
7 improving the relationship with her primary provider, stating "It [would] make me feel better  
8  
9 knowing that somebody cares [...] They could give advice on the phone telling me what I should  
10  
11 do. And I could do that to prevent going to the hospital because I'm in the hospital a lot."

### 14 *Self Triage Leading to Potentially Avoidable ED Use*

15  
16  
17 We found that patients were typically going directly to the Emergency Department (ED)  
18  
19 without contacting their primary care provider: "I could tell the pain, if it is severe enough to go  
20  
21 to the PCC and sit around to be called in the clinic or do I need to just get out there and go right  
22  
23 to the emergency room. So I could tell the difference, I learned to know my body now after  
24  
25 getting so sick and the last three years I've been very sick."

26  
27  
28 Patients commonly cited inability to reach their primary provider via telephone and the  
29  
30 belief that the PCC could not treat acute illness as reasons for going directly to the ED. One  
31  
32 patient explained that "I know that once I get there [to the PCC], they would send me anyway so  
33  
34 I might just as well go to the [ED] first."

35  
36  
37 Finally, amongst patients who decided to go to the ED instead of going for an urgent  
38  
39 primary care visit, a common theme was delaying action until the situation became more serious.  
40  
41 One patient commented "I wait[ed] instead to get better [...] my head was pounding and when I  
42  
43 walked to the bathroom I'd be staggering [...] I mashed my lifeline, and the ambulance picked  
44  
45 me up."

### 46 *Adequacy of Formal Services*

47  
48  
49 We found that patients had limited or no difficulty accessing formal services such as  
50  
51 medication assistance, home care, and transportation. All patients except one were able to obtain  
52  
53  
54  
55  
56  
57  
58  
59  
60



1  
2  
3 medications either despite financial barriers or with no financial barriers. One patient noted “I  
4 got medical and they basically pay for [medications].” Patients similarly found home care  
5 accessible, describing “Well, I have a nurse coming usually once a week and more often if there  
6 is something going on.” Formal transportation was obtained with minimal difficulty, with one  
7 patient explaining “They have a car that gets me [...] I have to call and make an appointment and  
8 they would call people telling them two days in advance.”  
9  
10  
11  
12  
13  
14  
15  
16

### 17 *Heavy Reliance on Informal Support Systems*

18  
19  
20 Despite the widespread availability and use of formal post-discharge support systems,  
21 patients reported still relying heavily on informal support from friends and family members to  
22 help with transportation and medication management. One patient described “So my daughter  
23 sets them out now so it makes it easier for the visit nurse, so that’s how I manage my medication  
24 at home. They put it in a little blue container and my daughter sets them up by the week.”  
25  
26 Another patient commented “If I can’t move, my family give me a ride - my daughter, my man,  
27 my niece, my nephew, my son.” Patients demonstrated resilient attitudes based on the high  
28 degree of support they received from friends and family members, and notably described that  
29 they did not feel lonely or socially isolated despite spending a great deal of time in the hospital.  
30  
31 Patients also reported feeling safe at home.  
32  
33  
34  
35  
36  
37  
38  
39  
40  
41  
42

### 43 *Inadequate Access to Care*

44  
45  
46 The most commonly cited problem inhibiting patients from accessing medical care was  
47 an impaired ability to speak to their provider on the telephone. This was described as both  
48 difficulty in reaching someone on the phone as well as long waiting times before receiving a call  
49 back from a provider. As one patient noted, “I don’t call primary care because it takes too long to  
50 get through to anybody until you get the call – I could have gone on a trip to Europe and back.”  
51  
52  
53  
54  
55  
56  
57  
58  
59  
60

1  
2  
3 Patients also noted that they had stopped even trying to call based on prior experiences:  
4  
5 “I try to call the Primary Care Center. But it’s like that one time that took 7 hours. I haven’t  
6  
7 called them [since]. So it’s like either I stick it out and let the pain or whatever subside, or I go  
8  
9 down to the ER. If I called them one time and it took them some hours to get back to me, I feel  
10  
11 that it’s useless if I call again.”  
12  
13

## 14 Discussion

15  
16 In this study of underserved patients with a high frequency of hospital readmissions, we  
17  
18 found that there may be factors contributing to readmissions that are not addressed by most  
19  
20 current interventions, which typically target access to formal outpatient services [3, 15, 16].  
21  
22 Contrary to our expectations, patients from our sample did not have difficulty accessing  
23  
24 medications, home care, or transportation. Rather, the primary factors contributing to  
25  
26 readmissions that were consistently brought up by patients in our study were self triage to the ED  
27  
28 and a lack of primary care relationship.  
29  
30  
31  
32  
33

34 While other studies have examined the challenges in transitions from inpatient care [8,  
35  
36 17], we explored how patients interacted with the health system when they were home. We  
37  
38 found that patients delayed care and then made the decision to go to the ED without attempting  
39  
40 to contact their primary providers. This delay of care likely resulted in a worsening of their  
41  
42 health status which consequently precipitated another hospital admission. The most consistent  
43  
44 reasons for not reaching out to their primary providers were inability to speak with a provider on  
45  
46 the phone, the belief that their primary care provider could not manage urgent issues, and patient  
47  
48 perception that their primary care provider could not address their concerns in a timely manner.  
49  
50  
51  
52

53 Our results differ from other qualitative studies evaluating readmissions. In a recent  
54  
55 article by Strunin et al (2007), patients expressed that they had inadequate medical care at home  
56  
57  
58  
59  
60

1  
2  
3 and lacked transportation to appointments [3]. In contrast, we found that these needs were being  
4 met for our high-risk patients. Similarly, a recent survey by Kangovi et al (2012) of patients that  
5 had been readmitted found that lack of medication adherence after discharge was commonly  
6 attributed to difficulty paying for medications and obtaining transportation [8]. In our sample of  
7 patients, only one patient reported not being able to obtain medications due to cost. Although  
8 other studies have included patients with one or more readmission within 30 days of discharge,  
9 we utilized more stringent enrollment criteria, requiring patients to have had four or more  
10 admissions in the prior six months. The high-risk underserved patients that we enrolled likely  
11 had more interaction with the health system than other patients with fewer hospital admissions,  
12 and therefore more opportunity to be linked in with formal services such as VNA and arranged  
13 transportation. Thus our findings suggest that this population of patients needs more targeted  
14 interventions to address the consistently stated problems of self triage and a lack of primary care  
15 relationship.  
16  
17  
18  
19  
20  
21  
22  
23  
24  
25  
26  
27  
28  
29  
30  
31  
32  
33

34 First, it is critical to have easy telephone access to primary care offices, as this is the  
35 preferred method of communication for patients and is linked to improved patient outcomes [18-  
36 20]. An effective telephone system would triage urgent issues, and would ensure that a member  
37 of the patient's provider team is available to field urgent calls. Patients in our study commonly  
38 mentioned that they wanted to receive a timely call back for urgent issues. Open access  
39 scheduling, which minimizes scheduled appointments to maximize same-day visit availability,  
40 typically also improves telephone access by opening up the calendar and streamlining the types  
41 of appointments that can be made. The time taken per call is consequently shorter [21, 22].  
42  
43  
44  
45  
46  
47  
48  
49  
50  
51  
52  
53 Alternatively, many new electronic medical record systems allow secure messaging through the  
54 electronic medical record, thereby reducing demand for telephone access, and facilitating timely  
55  
56  
57  
58  
59  
60

1  
2  
3 responses to urgent calls [23, 24]. Future research regarding the best modes of communication  
4  
5 with providers will be an important area of inquiry moving forward.  
6  
7

8         Second, many patients in our study had stopped calling their primary care provider  
9  
10 because of their perceptions of the primary care clinic as incapable of handling acute medical  
11  
12 concerns. Patient experiences, such as being transferred from their primary care office to the ED,  
13  
14 shaped their perception of the primary care clinic. Once access to providers has been improved  
15  
16 and the lack of primary care relationship has been repaired, we would suggest educating patients  
17  
18 about the scope of their primary care clinics as urgent care centers, as well as the role of their  
19  
20 primary providers in their care when they have a change in their health status. In addition,  
21  
22 providers should discuss their role in helping patients make triage decisions when they get sick at  
23  
24 home.  
25  
26  
27  
28

29         Third, patient-provider continuity is essential and has been consistently associated with  
30  
31 improved patient outcomes and satisfaction [25, 26]. To address the lack of primary care  
32  
33 relationship that patients described, there must first be a system in place that enables patients to  
34  
35 have continuity with their teams when they have a change in their health status [10]. This is  
36  
37 especially difficult in clinics staffed by residents who are present one half day per week, which is  
38  
39 a common model for internal medicine residency programs. When patients have urgent issues  
40  
41 that arise, they are often seen by providers who are not part of their primary care team. A  
42  
43 strategy for improving upon this situation would be to arrange residents into practice-partner  
44  
45 teams where they would work together to care for a larger panel of patients. While the patients  
46  
47 would still need to become familiar with a team of resident physicians, this has the potential to  
48  
49 make patients feel more comfortable seeking care for acute issues. This team-based care would  
50  
51 also aid in the conversion of primary care clinics to patient-centered medical homes, where  
52  
53  
54  
55  
56  
57  
58  
59  
60

1  
2  
3 continuity is an essential tenet.  
4

5 Our study has several limitations. First, we focused on an underserved population; our  
6 results may not apply to other populations. Second, our sample size is small, though we did  
7 employ a comprehensive strategy to identify patients meeting our enrollment criteria during the  
8 study period, and we did reach theoretical saturation as evidenced by no new themes being  
9 introduced in the final interviews. Third, we conducted our study at a single site, and there may  
10 be other factors more prevalent at other sites contributing to readmission.  
11  
12  
13  
14  
15  
16  
17  
18  
19

20 In summary, we found that even though patients were receiving the formal services that  
21 they needed, they were still being driven to make the decision to go to the ED based on based on  
22 long phone wait times for primary care and their belief or experience that primary care cannot  
23 treat their acute problems. We propose that educating patients about the capability and role of the  
24 primary care provider while concurrently streamlining telephone access to providers could  
25 enhance continuity and thereby prevent readmissions. Focusing entirely on arranging formal  
26 transitional care services, such as transportation and medications, is unlikely to be adequate in  
27 reducing readmissions.  
28  
29  
30  
31  
32  
33  
34  
35  
36  
37  
38  
39  
40  
41  
42  
43  
44  
45  
46  
47  
48  
49  
50  
51  
52  
53  
54  
55  
56  
57  
58  
59  
60

## Acknowledgements

*Funders:* Dr. Horwitz is supported by the National Institute on Aging (K08 AG038336) and by the American Federation for Aging Research through the Paul B. Beeson Career Development Award Program. This work was also supported by a grant from the Claude D. Pepper Older Americans Independence Center at Yale University School of Medicine (P30AG021342 NIH/NIA). No funding source had any role in the study design; in the collection, analysis, and interpretation of data; in the writing of the report; or in the decision to submit the article for publication. The content is solely the responsibility of the authors and does not necessarily represent the official views of the National Institute on Aging, the National Institutes of Health, or the American Federation for Aging Research.

*Access to data:* Leora Horwitz had full access to all of the data in the study and takes responsibility for the integrity of the data and the accuracy of the data analysis.

*Prior presentations:* An earlier version of this work was presented as an oral presentation at the Society of General Internal Medicine Annual Meeting in Orlando, FL on May 12, 2012.

*Conflicts of interest:* The authors have no conflicts of interest to report.

## References

1. Jencks SF, Williams MV, Coleman EA. Rehospitalizations among patients in the Medicare fee-for-service program. *The New England journal of medicine* 2009;**360**(14):1418-28 doi: 10.1056/NEJMsa0803563[published Online First: Epub Date]].
2. Hansen LO, Young RS, Hinami K, et al. Interventions to reduce 30-day rehospitalization: a systematic review. *Annals of internal medicine* 2011;**155**(8):520-8 doi: 10.1059/0003-4819-155-8-201110180-00008[published Online First: Epub Date]].
3. Strunin L, Stone M, Jack B. Understanding rehospitalization risk: can hospital discharge be modified to reduce recurrent hospitalization? *J Hosp Med* 2007;**2**(5):297-304
4. Weissman JS, Stern RS, Epstein AM. The impact of patient socioeconomic status and other social factors on readmission: a prospective study in four Massachusetts hospitals. *Inquiry : a journal of medical care organization, provision and financing* 1994;**31**(2):163-72
5. Billings J, Zeitel L, Lukomnik J, et al. Impact of socioeconomic status on hospital use in New York City. *Health affairs (Project Hope)* 1993;**12**(1):162-73
6. Kalra AD, Fisher RS, Axelrod P. Decreased length of stay and cumulative hospitalized days despite increased patient admissions and readmissions in an area of urban poverty. *Journal of general internal medicine* 2010;**25**(9):930-5 doi: 10.1007/s11606-010-1370-5[published Online First: Epub Date]].
7. Allaudeen N, Vidyarthi A, Maselli J, et al. Redefining readmission risk factors for general medicine patients. *Journal of hospital medicine : an official publication of the Society of Hospital Medicine* 2011;**6**(2):54-60 doi: 10.1002/jhm.805[published Online First: Epub Date]].
8. Kangovi S, Grande D, Meehan P, et al. Perceptions of readmitted patients on the transition from hospital to home. *Journal of hospital medicine : an official publication of the Society of Hospital Medicine* 2012;**7**(9):709-12 doi: 10.1002/jhm.1966[published Online First: Epub Date]].
9. Raven MC, Billings JC, Goldfrank LR, Manheimer ED, Gourevitch MN. Medicaid patients at high risk for frequent hospital admission: real-time identification and remediable risks. *Journal of urban health : bulletin of the New York Academy of Medicine* 2009;**86**(2):230-41 doi: 10.1007/s11524-008-9336-1[published Online First: Epub Date]].
10. Englander H, Kansagara D. Planning and designing the care transitions innovation (C-Train) for uninsured and Medicaid patients. *Journal of hospital medicine : an official publication of the Society of Hospital Medicine* 2012;**7**(7):524-9 doi: 10.1002/jhm.1926[published Online First: Epub Date]].
11. Annema C, Luttik ML, Jaarsma T. Reasons for readmission in heart failure: Perspectives of patients, caregivers, cardiologists, and heart failure nurses. *Heart & lung : the journal of critical care* 2009;**38**(5):427-34 doi: 10.1016/j.hrtlng.2008.12.002[published Online First: Epub Date]].
12. Kroenke K, Spitzer RL, Williams JB. The Patient Health Questionnaire-2: validity of a two-item depression screener. *Medical care* 2003;**41**(11):1284-92 doi: 10.1097/01.mlr.0000093487.78664.3c[published Online First: Epub Date]].
13. Smith PC, Schmidt SM, Allensworth-Davies D, et al. Primary care validation of a single-question alcohol screening test. *Journal of general internal medicine* 2009;**24**(7):783-8 doi: 10.1007/s11606-009-0928-6[published Online First: Epub Date]].
14. Glaser BG, Strauss AL. *The Discovery of Grounded Theory: Strategies for Qualitative Research*. New York: Aldine, 1967.
15. Boling PA. Care transitions and home health care. *Clinics in geriatric medicine* 2009;**25**(1):135-48, viii doi: 10.1016/j.cger.2008.11.005[published Online First: Epub Date]].

16. Pearson S, Inglis SC, McLennan SN, et al. Prolonged effects of a home-based intervention in patients with chronic illness. *Archives of internal medicine* 2006;**166**(6):645-50 doi: 10.1001/archinte.166.6.645[published Online First: Epub Date]].
17. Davis MM, Devoe M, Kansagara D, Nicolaidis C, Englander H. "Did I do as best as the system would let me?" Healthcare professional views on hospital to home care transitions. *Journal of general internal medicine* 2012;**27**(12):1649-56 doi: 10.1007/s11606-012-2169-3[published Online First: Epub Date]].
18. LaVela SL, Schectman G, Gering J, et al. Understanding health care communication preferences of veteran primary care users. *Patient education and counseling* 2012;**88**(3):420-6 doi: 10.1016/j.pec.2012.06.004[published Online First: Epub Date]].
19. Wasson J, Gaudette C, Whaley F, et al. Telephone care as a substitute for routine clinic follow-up. *JAMA : the journal of the American Medical Association* 1992;**267**(13):1788-93
20. Curry SJ, McBride C, Grothaus LC, et al. A randomized trial of self-help materials, personalized feedback, and telephone counseling with nonvolunteer smokers. *Journal of consulting and clinical psychology* 1995;**63**(6):1005-14
21. Steinbauer JR, Korell K, Erdin J, et al. Implementing open-access scheduling in an academic practice. *Family practice management* 2006;**13**(3):59-64
22. Rose KD, Ross JS, Horwitz LI. Advanced access scheduling outcomes: a systematic review. *Arch Intern Med* 2011;**171**(13):1150-9 doi: 10.1001/archinternmed.2011.168[published Online First: Epub Date]].
23. Zhou YY, Garrido T, Chin HL, et al. Patient access to an electronic health record with secure messaging: impact on primary care utilization. *The American journal of managed care* 2007;**13**(7):418-24
24. Coleman EA. Falling through the cracks: challenges and opportunities for improving transitional care for persons with continuous complex care needs. *Journal of the American Geriatrics Society* 2003;**51**(4):549-55
25. Wasson JH, Sauvigne AE, Mogielnicki RP, et al. Continuity of outpatient medical care in elderly men. A randomized trial. *JAMA : the journal of the American Medical Association* 1984;**252**(17):2413-7
26. van Walraven C, Oake N, Jennings A, et al. The association between continuity of care and outcomes: a systematic and critical review. *Journal of evaluation in clinical practice* 2010;**16**(5):947-56 doi: 10.1111/j.1365-2753.2009.01235.x[published Online First: Epub Date]].



1  
2  
3 **Appendix 1:** List of questions from interview instrument  
4

5 Tell me what happened to you since you went home between last discharge and now?  
6

7  
8 Do you think there is anything else that could have been done to have prevented you from  
9 coming back to hospital, and if so what?  
10

11 When you have a change in your health at home, or start to feel sick at home, how do you make  
12 the decision to try to reach your PMD versus going to the ED?  
13

14  
15 How often do you try to reach your PMD as opposed to going to the ED?  
16

17  
18 When you have a change in your health at home, or start to feel sick at home, how long have you  
19 waited in the past before contacting your provider?  
20

21 Can you tell me about the medications you take at home?  
22

23  
24 Has a financial barrier or problem ever resulted in you not being able to obtain the medications  
25 that you need? If so, tell me about it. Has this been a common problem for you?  
26

27 How do you manage your medications at home?  
28

29 Do you have any difficulty with your medications?  
30

31 Tell me what it's like at home for you?  
32

33  
34 Do you have people who can help you at home?  
35

36 Do you feel safe at home?  
37

38  
39 How do you think of the social support you have at home?  
40

41 What is your financial situation?  
42

43  
44 In what ways do you have difficulty getting to and from your primary care appointments, if at  
45 all?  
46

47 How do you get around?  
48

49 In the last couple of weeks, have you been feeling depressed?  
50

51  
52 Have you ever been on any medications for depression?  
53

54 Do you feel like these feelings of depression have caused you to have to come to hospital more  
55 than you otherwise would have to?  
56  
57  
58  
59  
60

1  
2  
3 What's your relationship with your primary doctor at the Primary Care Center?  
4

5  
6 Do you know the name of your PMD, and do you have difficulty reaching your primary doctor if  
7 you're having a problem?  
8

9  
10 How can your primary doctor help to prevent you from having to be readmitted to the hospital do  
11 you think?  
12

13  
14 Can you think of anything more your primary doctor, or the Primary Care Center here at Yale  
15 could do?  
16

17  
18 What do you think are some other things that can be done to help prevent you from having to  
19 come back to the hospital, if anything?  
20

21  
22 Is there anything else that you think that either you or the physicians in the community could do  
23 to help you with that?  
24

25  
26 Do you need any more home support (home nursing care, VNA, etc) than you currently are  
27 receiving?  
28

29  
30 Finally, do you think it would be helpful for your primary doctor to call you at home to check in  
31 with you on a regular basis, and why?  
32  
33  
34  
35  
36  
37  
38  
39  
40  
41  
42  
43  
44  
45  
46  
47  
48  
49  
50  
51  
52  
53  
54  
55  
56  
57  
58  
59  
60

1  
2  
3  
4  
5  
6  
7  
8  
9  
10  
11  
12  
13  
14  
15  
16  
17  
18  
19  
20  
21  
22  
23  
24  
25  
26  
27  
28  
29  
30  
31  
32  
33  
34  
35  
36  
37  
38  
39  
40  
41  
42  
43  
44  
45  
46  
47  
48  
49  
50  
51  
52  
53  
54  
55  
56  
57  
58  
59  
60

**Title:** Reasons for readmission in an underserved high-risk population: A qualitative analysis of a series of inpatient interviews ~~Reasons for Readmission in a High-Risk Population~~

**Authors:** Theodore Long, MD;<sup>1</sup> Inginia Genao, MD;<sup>2</sup> Leora I. Horwitz, MD, MHS<sup>2,3</sup>

**Running Title:** High-Risk Readmissions

**Author affiliations:**

<sup>1</sup>Internal Medicine Residency Program, Department of Internal Medicine, Yale School of Medicine, New Haven, CT

<sup>2</sup>Section of General Internal Medicine, Department of Internal Medicine, Yale School of Medicine, New Haven, CT

<sup>3</sup>Center for Outcomes Research and Evaluation, Yale-New Haven Hospital, New Haven, CT

Corresponding author:

Theodore Long, MD

Yale Traditional Internal Medicine Residency Training Program

PO Box 208030

New Haven, CT 06520-8030

Tel: (203) 785-4123

Fax: (203) 785-7258

theodore.long@yale.edu

Word count: ~~33473000~~

Tables: 1

Figures: 0

References: ~~262~~

Word count (abstract): 214

Key words: access to care, care transitions, underserved populations, qualitative research, primary care

## Abstract

Objective: To gather qualitative data to elucidate the reasons for readmissions in a high-risk population of underserved patients.

Design: We created an instrument with 27 open-ended questions based on current interventions.

Setting: Yale-New Haven Hospital.

Patients: Patients at the Yale Adult Primary Care Center (PCC).

Measurements: We conducted semi-structured qualitative interviews of patients who had four or more admissions in the previous six months and were currently readmitted to the hospital.

Results: We completed 17 interviews and identified themes relating to risk of readmission. We found that patients went directly to the Emergency Department (ED) when they experienced a change in health status without contacting their primary provider. Reasons for this included poor telephone or urgent care access and the belief that the PCC could not treat acute illness. Many patients could not name their primary provider. Conversely, every patient except one reported being able to obtain medications without undue financial burden, and every patient reported receiving adequate home care services.

Conclusions: These high-risk patients were receiving the formal services that they needed, but were making the decision to go to the ED because of inadequate access to care and fragmented primary care relationships. Formal transitional care services are unlikely to be adequate in reducing readmissions without also addressing primary care access and continuity.

## Article Summary

### Article Focus:

- We asked the question of what unique factors were contributing to readmissions in a high-risk urban underserved population
- We explored patient perceptions of areas of current interventions, including home services, medications, and transportation
- We propose interventions based on our findings, and compare our results to other studies looking at readmissions

### Key Messages:

- We found that there are factors contributing to readmissions that are not addressed by current intervention strategies
- In our high-risk population, there was a lack of primary care relationship and a tendency to delay seeking care that resulted in patients triaging themselves to the Emergency Department

### Strengths and Limitations of this Study:

- Limitations include this being a single site study with a focus on patients at the highest risk of readmission; thus findings may not be comparable to other populations
- Strengths include elucidating the perspectives of an underrepresented population of patients and defining key areas for intervention in this population

## Introduction

Hospital readmissions represent a significant cost to the healthcare system and are a burden to patients. Nationally, 19.6% of Medicare beneficiaries discharged from the hospital are readmitted within 30 days and 34.0% are readmitted within 90 days.<sup>[1]</sup> Many attempts have been made to identify and address the issues leading to readmission. However, no single strategy has been found to reproducibly reduce readmissions.<sup>[2]</sup> Most studies evaluating this problem have focused on chart review and administrative data, but there is a paucity of qualitative information from the perspectives of patients.<sup>[3]</sup> It has been unclear what happens to patients once they are discharged from the hospital, and whether their health care outside of the hospital could be improved in order to prevent what elements of their outpatient health care are inadequate in preventing hospital readmissions.

This study examined patient experiences after hospital discharge by conducting qualitative interviews of high-risk patients during readmission. We studied the urban underserved population of patients at Yale-New Haven Hospital (YNHH) with the highest incidence of readmission. We chose to assess this population because the urban underserved comprise a disproportionate share of readmissions at many academic medical centers.<sup>[4-7]</sup> Furthermore, patients with low socioeconomic status have been shown to have a distinctly challenging experience transitioning from inpatient admission to home.<sup>[8-10]</sup>

We sought to understand the perspectives of underserved patients at the highest risk of readmission in order to determine how future interventions could be more effective for this population. We examined their transition of care from the hospital to home, focusing on how they interacted with the health system once they left the hospital and what factors drove them to be readmitted so frequently.

## Methods

### *Setting*

We focused our study on the underserved population at YNHH, a 966 bed urban academic medical center. We interviewed patients cared for at the Yale Adult Primary Care Center (PCC), which is a hospital-based clinic serving primarily the low-income residents of New Haven. The PCC is staffed by internal medicine residents who are typically present for one half day per week as well as part and full time attending providers. Residents are assigned to the PCC for their entire three years of training.

### *Study Cohort*

Our study population was comprised of PCC patients with four or more admissions in the past six months, which is one of YNHH's criteria for high risk. At the time of this study, less than 150 patients at YNHH met this high-risk criterion, and of these 25% were PCC patients. We arranged for our medical record system to send a daily email listing all patients designated as high-risk currently admitted at YNHH. The criteria for this designation are either four or more admissions in the past six months or a diagnosis of heart failure. From the daily list, we identified patients who had four or more admissions in the past six months and identified all ~~patients~~ who had an established primary care provider in the PCC as well as at least two completed clinic notes from the prior 12 months. We set out the requirement for at least two clinic notes to ensure that enrolled patients were actively followed by the PCC. We then restricted this group to patients who were currently readmitted within 30 days of their last date of discharge from YNHH. All interviews were conducted inpatient during the patients' readmission stays. We ~~conducted~~ completed the study from October, 2011 to April, 2012. Interviews were

1  
2  
3 | completed on both weekdays and weekends. Twenty-one eligible patients were identified during  
4  
5  
6 | the study period, and four declined.

### 7 8 *Design*

9  
10 We created an instrument with 27 open-ended questions based on areas targeted by  
11  
12 | current interventions as well as other qualitative studies looking at readmissions [3, 11]. We  
13  
14 | then conducted pilot interviews and solicited feedback about the interview questions from  
15  
16 | patients. The instrument was revised based on this feedback. We also extensively reviewed the  
17  
18 | first complete interview transcription, and further revised the instrument based on this feedback  
19  
20 | as well. The instrument was then revised based on pilot interviews and feedback. The final  
21  
22 |  
23  
24 | questions in the instrument included the areas of transportation, support systems, medications,  
25  
26 | formal services, health literacy, access to care, relationship with provider, communication with  
27  
28 | providers, and transitions of care (see Appendix 1 for list of questions). For questions asking for  
29  
30 | an affirmative/negative or numerical response, we used a strategy of planned prompts and probes  
31  
32 | to extend the narrative. We also included screening for depression via the Patient Health  
33  
34 | Questionnaire-2 (PHQ-2) [12] and for unhealthy alcohol use via the National Institute on  
35  
36 | Alcohol Abuse and Alcoholism (NIAAA) recommended tool [13]. The IRB waived the written  
37  
38 | consent requirement due to the fact that no identifying information was used. Informed consent  
39  
40 | was obtained verbally from all study participants. One investigator (T.L.) conducted semi-  
41  
42 | structured interviews. The interviews were recorded and then transcribed by a subcontracted  
43  
44 | transcriber.

### 45 46 47 48 49 *Analysis*

50  
51  
52 | Three investigators (T.L., I.G., L.H.) independently generated codes from the primary  
53  
54 | transcriptions. The codes represented themes found in the data. The investigators initially coded  
55  
56 |  
57  
58  
59  
60



1  
2  
3 the first four transcriptions independently and then reviewed the coding scheme and resolved  
4  
5 discrepancies collaboratively. The transcriptions were saved as Microsoft Word documents, with  
6  
7 codes being tracked as Comments within these documents. This process was repeated two more  
8  
9 times, with all transcriptions being coded independently and then meeting to come to a group  
10  
11 consensus. It was decided ahead of time that transcriptions would be coded until theoretical  
12  
13 saturation was reached and no new codes were being introduced in the interviews. A final code  
14  
15 list was developed using the constant comparative method <sup>14</sup>. The codes were organized into  
16  
17 11 main themes.

## 21 Results

22  
23  
24  
25  
26 We completed 17 interviews (11 women, 6 men). On average, the interviews were 15 to  
27  
28 20 minutes long. Every patient except one screened negative for unhealthy alcohol use per the  
29  
30 NIAAA tool and 47% had a positive screen for depression per the PHQ-2. We identified 11  
31  
32 themes (Table 1), and describe five relating to risk of readmission: ~~lack of~~ fragmented primary  
33  
34 care relationships contributing to avoidance of ambulatory care, self triage leading to potentially  
35  
36 avoidable ED use, adequacy of formal services, heavy reliance on informal support systems,  
37  
38 inadequate access to care. The codes contributing to these five themes were consistent  
39  
40 throughout the interviews and pertained to either reasons for readmission or current interventions  
41  
42 targeted at decreasing readmissions. The other themes represented self-reported descriptions,  
43  
44 such as substance abuse for the theme of patient characteristics. Overall, we found that while  
45  
46 patients described receiving adequate formal services, barriers in accessing care and disjointed  
47  
48 primary care relationships led to patients making their own triage decisions and seeking other  
49  
50 support systems.  
51  
52  
53  
54  
55  
56  
57  
58  
59  
60

**Table 1:** 11 Main Themes

|                                                                                                                     |
|---------------------------------------------------------------------------------------------------------------------|
| <u>Heavy Reliance on</u> Informal Support Systems                                                                   |
| <u>Adequacy of</u> Formal Services                                                                                  |
| Health Literacy                                                                                                     |
| <u>Inadequate</u> Access to Care                                                                                    |
| <del>Lack of</del> <u>Fragmented</u> Primary Care Relationships <u>Contributing to Avoidance of Ambulatory Care</u> |
| Self Triage <u>Leading to Potentially Avoidable ED Use</u>                                                          |
| Patient Phone Call                                                                                                  |
| Discharge Planning                                                                                                  |
| Patient Characteristics                                                                                             |
| Readmissions (same or different complaint)                                                                          |
| Post-Discharge Course                                                                                               |

~~Lack of~~Fragmented Primary Care Relationships Contributing to Avoidance of Ambulatory Care

Participants described a fragmented relationship with their providers. Nine patients were able to name their primary provider, while seven patients were unable to. In terms of their connection with their provider, many expressed concern: “I ain’t got no relationship. I don’t even know the person. They don’t even know me. There was no relationship.”

Patients further referred to provider turnover and large provider teams as deleterious to

1  
2  
3 developing a relationship with their providers. One patient explained: “Well, I hate that they  
4 keep switching doctors. They can’t really keep the same doctor because as soon as you get  
5 comfortable with one person they’ll let you know somebody else is there. Now it’s like you got  
6 to learn this person all over. I hate changing doctors. I don’t like that.” Another patient described  
7 improving the relationship with her primary provider, stating “It [would] make me feel better  
8 knowing that somebody cares [...] They could give advice on the phone telling me what I should  
9 do. And I could do that to prevent going to the hospital because I’m in the hospital a lot.”

#### 10 *Self Triage Leading to Potentially Avoidable ED Use*

11  
12 We found that patients were typically going directly to the Emergency Department (ED)  
13 without contacting their primary care provider: “I could tell the pain, if it is severe enough to go  
14 to the PCC and sit around to be called in the clinic or do I need to just get out there and go right  
15 to the emergency room. So I could tell the difference, I learned to know my body now after  
16 getting so sick and the last three years I’ve been very sick.”

17  
18 Patients commonly cited inability to reach their primary provider via telephone and the  
19 belief that the PCC could not treat acute illness as reasons for going directly to the ED. One  
20 patient explained that “I know that once I get there [to the PCC], they would send me anyway so  
21 I might just as well go to the [ED] first.”

22  
23 Finally, amongst patients who decided to go to the ED instead of going for an urgent  
24 primary care visit, a common theme was delaying action until the situation became more serious.  
25 One patient commented “I wait[ed] instead to get better [...] my head was pounding and when I  
26 walked to the bathroom I'd be staggering [...] I mashed my lifeline, and the ambulance picked  
27 me up.”

#### 28 *Adequacy of Formal Services*

1  
2  
3 We found that patients had limited or no difficulty accessing formal services such as  
4 medication assistance, home care, and transportation. All patients except one were able to obtain  
5 medications either despite financial barriers or with no financial barriers. One patient noted “I  
6 got medical and they basically pay for [medications].” Patients similarly found home care  
7 accessible, describing “Well, I have a nurse coming usually once a week and more often if there  
8 is something going on.” Formal transportation was obtained with minimal difficulty, with one  
9 patient explaining “They have a car that gets me [...] I have to call and make an appointment and  
10 they would call people telling them two days in advance.”  
11  
12  
13  
14  
15  
16  
17  
18  
19  
20  
21

### 22 Heavy Reliance on Informal Support Systems

23  
24  
25 Despite the widespread availability and use of formal post-discharge support systems,  
26 patients reported still relying heavily on informal support from friends and family members to  
27 help with transportation and medication management. One patient described “So my daughter  
28 sets them out now so it makes it easier for the visit nurse, so that’s how I manage my medication  
29 at home. They put it in a little blue container and my daughter sets them up by the week.”  
30  
31  
32  
33  
34  
35

36 Another patient commented “If I can’t move, my family give me a ride - my daughter, my man,  
37 my niece, my nephew, my son.” Patients demonstrated resilient attitudes based on the high

38  
39 degree of support they received from friends and family members, and notably described that  
40 they did not feel lonely or socially isolated despite spending a great deal of time in the hospital.

41  
42  
43 Patients also reported feeling safe at home.  
44  
45

### 46 Inadequate Access to Care

47  
48  
49 The most commonly cited problem inhibiting patients from accessing medical care was  
50 an impaired ability to speak to their provider on the telephone. This was described as both  
51 difficulty in reaching someone on the phone as well as long waiting times before receiving a call  
52  
53  
54  
55  
56  
57  
58  
59  
60

1  
2  
3 back from a provider. As one patient noted, “I don’t call primary care because it takes too long to  
4  
5 get through to anybody until you get the call – I could have gone on a trip to Europe and back.”  
6  
7

8 Patients also noted that they had stopped even trying to call based on prior experiences:  
9  
10 “I try to call the Primary Care Center. But it’s like that one time that took 7 hours. I haven’t  
11  
12 called them [since]. So it’s like either I stick it out and let the pain or whatever subside, or I go  
13  
14 down to the ER. If I called them one time and it took them some hours to get back to me, I feel  
15  
16 that it’s useless if I call again.”  
17  
18

## 19 Discussion

20  
21  
22 In this study of underserved patients with a high frequency of hospital readmissions, we  
23  
24 found that there may be factors contributing to readmissions that are not addressed by most  
25  
26 current interventions, which typically target access to formal outpatient services <sup>3, 15, 16</sup>.  
27  
28 Contrary to our expectations, patients from our sample did not have difficulty accessing  
29  
30 medications~~patients did not have difficulty accessing medications~~, home care, or transportation.  
31  
32  
33 Rather, the primary factors contributing to readmissions that were consistently brought up by  
34  
35 patients in our study were self triage to the ED and a lack of primary care relationship.  
36  
37

38  
39 While other studies have examined the challenges in transitions from inpatient care <sup>8,</sup>  
40  
41 <sup>17</sup>, we explored how patients ~~were interacting~~interacted with the health system when they were  
42  
43 home. We found that patients ~~were delaying~~delayed care and then ~~making~~made the decision to  
44  
45 go to the ED without attempting to contact their primary providers. This delay of care likely  
46  
47 resulted in a worsening of their health status which consequently precipitated another hospital  
48  
49 admission. The most consistent reasons for not reaching out to their primary providers were  
50  
51 inability to speak with a provider on the phone, the belief that their primary care provider could  
52  
53 not manage urgent issues, and patient perception that their primary care provider could not  
54  
55  
56  
57  
58  
59  
60

1  
2  
3 address their concerns in a timely manner.  
4

5 Our results differ from other qualitative studies evaluating readmissions. In a recent  
6 article by Strunin et al (2007), patients expressed that they had inadequate medical care at home  
7 and lacked transportation to appointments <sup>3</sup>. In contrast, we found that these needs were being  
8 met for our high-risk patients. Similarly, a recent survey by Kangovi et al (2012) of patients that  
9 had been readmitted found that lack of medication adherence after discharge was commonly  
10 attributed to difficulty paying for medications and obtaining transportation <sup>8</sup>. In our sample of  
11 patients, only one patient reported not being able to obtain medications due to cost. Although  
12 other studies have included patients with one or more readmission within 30 days of discharge,  
13 we utilized more stringent enrollment criteria, requiring patients to have had four or more  
14 admissions in the prior six months. The high-risk underserved patients that we enrolled likely  
15 had more interaction with the health system than other patients with fewer hospital admissions,  
16 and therefore more opportunity to be linked in with formal services such as VNA and arranged  
17 transportation. Thus our findings suggest that this population of patients needs more targeted  
18 interventions to address the consistently stated problems of self triage and a lack of primary care  
19 relationship.  
20  
21  
22  
23  
24  
25  
26  
27  
28  
29  
30  
31  
32  
33  
34  
35  
36  
37  
38  
39

40 First, it is critical to have easy telephone access to primary care offices, as this is the  
41 preferred method of communication for patients and is linked to improved patient outcomes <sup>18-</sup>  
42 <sup>20</sup>. ~~Inadequate telephone access contributes to patients having difficulty obtaining urgent care~~  
43 ~~when they have a change in health status.~~ An effective telephone system would triage urgent  
44 issues, and would ensure that a member of the patient's provider team is available to field urgent  
45 calls. Patients in our study commonly mentioned that they wanted to receive a timely call back  
46 for urgent issues. ~~Several strategies exist to improve telephone access.~~ Open access scheduling,  
47  
48  
49  
50  
51  
52  
53  
54  
55  
56  
57  
58  
59  
60

1  
2  
3 which minimizes scheduled appointments to maximize same-day visit availability, typically also  
4  
5 improves telephone access by opening up the calendar and streamlining the types of  
6  
7 appointments that can be made. The time taken per call is consequently shorter [-[21, 22].

8  
9  
10 Alternatively, many new electronic medical record systems allow secure messaging through the  
11  
12 electronic medical record [-This feature provides an alternative method of communication for  
13  
14 patients, thereby reducing demand for telephone access, and facilitating timely responses to  
15  
16 urgent calls [-[23, 24]. Future research regarding the best modes of communication with providers  
17  
18 will be an important area of inquiry moving forward.

19  
20  
21  
22 Second, many patients in our study had stopped calling their primary care provider  
23  
24 because of their perceptions of the primary care clinic as incapable of handling acute medical  
25  
26 concerns. Patient experiences, such as being transferred from their primary care office to the ED,  
27  
28 shaped their perception of the primary care clinic. Once access to providers has been improved  
29  
30 and the lack of primary care relationship has been repaired, ~~We~~ we would suggest educating  
31  
32 patients about the scope of their primary care clinics as urgent care centers, as well as the role of  
33  
34 their primary providers in their care when they have a change in their health status. In addition,  
35  
36 providers should discuss their role in helping patients make triage decisions when they get sick at  
37  
38 home.  
39  
40  
41  
42

43  
44 Third, patient-provider continuity is essential and has been consistently associated with  
45  
46 improved patient outcomes and satisfaction [-[25, 26]. To address the lack of primary care  
47  
48 relationship that patients described, there must first be a system in place that enables patients to  
49  
50 have continuity with their teams when they have a change in their health status [10]. This is  
51  
52 especially difficult in clinics staffed by residents who are present one half day per week, which is  
53  
54 a common model for internal medicine residency programs. When patients have urgent issues  
55  
56  
57  
58  
59  
60

1  
2  
3 that arise, they are often seen by providers who are not part of their primary care team. A  
4  
5 strategy for improving upon this situation would be to arrange residents into practice-partner  
6  
7 teams where they would work together to care for a larger panel of patients. ~~Residents would~~  
8  
9 ~~rotate ambulatory blocks such that a member of the team would be in clinic daily for the duration~~  
10  
11 ~~of an outpatient block to handle urgent issues that arise for any patient on the team panel. The~~  
12  
13 ~~patients would be well known to a small group of rotating residents.~~ While the patients would  
14  
15 still need to become familiar with a team of resident physicians, this has the potential to make  
16  
17 patients feel more comfortable seeking care for acute issues. This team-based care would also aid  
18  
19 in the conversion of primary care clinics to patient-centered medical homes, where continuity is  
20  
21 an essential tenet.  
22  
23  
24  
25  
26

27 Our study has several limitations. First, we focused on an underserved population; our  
28  
29 results may not apply to other populations. Second, our sample size is small, though we did  
30  
31 employ a comprehensive strategy to identify patients meeting our enrollment criteria during the  
32  
33 study period, and we did reach theoretical saturation as evidenced by no new themes being  
34  
35 introduced in the final interviews. Third, we conducted our study at a single site, and there may  
36  
37 be other factors more prevalent at other sites contributing to readmission.  
38  
39  
40

41 In summary, we found that even though patients were receiving the formal services that  
42  
43 they needed, they were still being driven to make the decision to go to the ED based on based on  
44  
45 long phone wait times for primary care and their belief or experience that primary care cannot  
46  
47 treat their acute problems. We propose that educating patients about the capability and role of the  
48  
49 primary care provider while concurrently streamlining telephone access to providers could  
50  
51 enhance continuity and thereby prevent readmissions. Focusing entirely on arranging formal  
52  
53 transitional care services, such as transportation and medications, is unlikely to be adequate in  
54  
55  
56  
57  
58  
59  
60



1  
2  
3 reducing readmissions.  
4  
5  
6  
7  
8  
9  
10  
11  
12  
13  
14  
15  
16  
17  
18  
19  
20  
21  
22  
23  
24  
25  
26  
27  
28  
29  
30  
31  
32  
33  
34  
35  
36  
37  
38  
39  
40  
41  
42  
43  
44  
45  
46  
47  
48  
49  
50  
51  
52  
53  
54  
55  
56  
57  
58  
59  
60

For peer review only

## Acknowledgements

*Funders:* Dr. Horwitz is supported by the National Institute on Aging (K08 AG038336) and by the American Federation for Aging Research through the Paul B. Beeson Career Development Award Program. This work was also supported by a grant from the Claude D. Pepper Older Americans Independence Center at Yale University School of Medicine (P30AG021342 NIH/NIA). No funding source had any role in the study design; in the collection, analysis, and interpretation of data; in the writing of the report; or in the decision to submit the article for publication. The content is solely the responsibility of the authors and does not necessarily represent the official views of the National Institute on Aging, the National Institutes of Health, or the American Federation for Aging Research.

*Access to data:* Leora Horwitz had full access to all of the data in the study and takes responsibility for the integrity of the data and the accuracy of the data analysis.

*Prior presentations:* An earlier version of this work was presented as an oral presentation at the Society of General Internal Medicine Annual Meeting in Orlando, FL on May 12, 2012.

*Conflicts of interest:* The authors have no conflicts of interest to report.

## References

1. Jencks SF, Williams MV, Coleman EA. Rehospitalizations among patients in the Medicare fee-for-service program. *The New England journal of medicine* 2009;**360**(14):1418-28 doi: 10.1056/NEJMsa0803563[published Online First: Epub Date]].
2. Hansen LO, Young RS, Hinami K, et al. Interventions to reduce 30-day rehospitalization: a systematic review. *Annals of internal medicine* 2011;**155**(8):520-8 doi: 10.1059/0003-4819-155-8-201110180-00008[published Online First: Epub Date]].
3. Strunin L, Stone M, Jack B. Understanding rehospitalization risk: can hospital discharge be modified to reduce recurrent hospitalization? *J Hosp Med* 2007;**2**(5):297-304
4. Weissman JS, Stern RS, Epstein AM. The impact of patient socioeconomic status and other social factors on readmission: a prospective study in four Massachusetts hospitals. *Inquiry : a journal of medical care organization, provision and financing* 1994;**31**(2):163-72
5. Billings J, Zeitel L, Lukomnik J, et al. Impact of socioeconomic status on hospital use in New York City. *Health affairs (Project Hope)* 1993;**12**(1):162-73
6. Kalra AD, Fisher RS, Axelrod P. Decreased length of stay and cumulative hospitalized days despite increased patient admissions and readmissions in an area of urban poverty. *Journal of general internal medicine* 2010;**25**(9):930-5 doi: 10.1007/s11606-010-1370-5[published Online First: Epub Date]].
7. Allaudeen N, Vidyarthi A, Maselli J, et al. Redefining readmission risk factors for general medicine patients. *Journal of hospital medicine : an official publication of the Society of Hospital Medicine* 2011;**6**(2):54-60 doi: 10.1002/jhm.805[published Online First: Epub Date]].
8. Kangovi S, Grande D, Meehan P, et al. Perceptions of readmitted patients on the transition from hospital to home. *Journal of hospital medicine : an official publication of the Society of Hospital Medicine* 2012;**7**(9):709-12 doi: 10.1002/jhm.1966[published Online First: Epub Date]].
9. Raven MC, Billings JC, Goldfrank LR, Manheimer ED, Gourevitch MN. Medicaid patients at high risk for frequent hospital admission: real-time identification and remediable risks. *Journal of urban health : bulletin of the New York Academy of Medicine* 2009;**86**(2):230-41 doi: 10.1007/s11524-008-9336-1[published Online First: Epub Date]].
10. Englander H, Kansagara D. Planning and designing the care transitions innovation (C-Train) for uninsured and Medicaid patients. *Journal of hospital medicine : an official publication of the Society of Hospital Medicine* 2012;**7**(7):524-9 doi: 10.1002/jhm.1926[published Online First: Epub Date]].
11. Annema C, Luttik ML, Jaarsma T. Reasons for readmission in heart failure: Perspectives of patients, caregivers, cardiologists, and heart failure nurses. *Heart & lung : the journal of critical care* 2009;**38**(5):427-34 doi: 10.1016/j.hrtlng.2008.12.002[published Online First: Epub Date]].
12. Kroenke K, Spitzer RL, Williams JB. The Patient Health Questionnaire-2: validity of a two-item depression screener. *Medical care* 2003;**41**(11):1284-92 doi: 10.1097/01.mlr.0000093487.78664.3c[published Online First: Epub Date]].
13. Smith PC, Schmidt SM, Allensworth-Davies D, et al. Primary care validation of a single-question alcohol screening test. *Journal of general internal medicine* 2009;**24**(7):783-8 doi: 10.1007/s11606-009-0928-6[published Online First: Epub Date]].
14. Glaser BG, Strauss AL. *The Discovery of Grounded Theory: Strategies for Qualitative Research*. New York: Aldine, 1967.
15. Boling PA. Care transitions and home health care. *Clinics in geriatric medicine* 2009;**25**(1):135-48, viii doi: 10.1016/j.cger.2008.11.005[published Online First: Epub Date]].

16. Pearson S, Inglis SC, McLennan SN, et al. Prolonged effects of a home-based intervention in patients with chronic illness. *Archives of internal medicine* 2006;**166**(6):645-50 doi: 10.1001/archinte.166.6.645[published Online First: Epub Date]].
17. Davis MM, Devoe M, Kansagara D, Nicolaidis C, Englander H. "Did I do as best as the system would let me?" Healthcare professional views on hospital to home care transitions. *Journal of general internal medicine* 2012;**27**(12):1649-56 doi: 10.1007/s11606-012-2169-3[published Online First: Epub Date]].
18. LaVela SL, Schectman G, Gering J, et al. Understanding health care communication preferences of veteran primary care users. *Patient education and counseling* 2012;**88**(3):420-6 doi: 10.1016/j.pec.2012.06.004[published Online First: Epub Date]].
19. Wasson J, Gaudette C, Whaley F, et al. Telephone care as a substitute for routine clinic follow-up. *JAMA : the journal of the American Medical Association* 1992;**267**(13):1788-93
20. Curry SJ, McBride C, Grothaus LC, et al. A randomized trial of self-help materials, personalized feedback, and telephone counseling with nonvolunteer smokers. *Journal of consulting and clinical psychology* 1995;**63**(6):1005-14
21. Steinbauer JR, Korell K, Erdin J, et al. Implementing open-access scheduling in an academic practice. *Family practice management* 2006;**13**(3):59-64
22. Rose KD, Ross JS, Horwitz LI. Advanced access scheduling outcomes: a systematic review. *Arch Intern Med* 2011;**171**(13):1150-9 doi: 10.1001/archinternmed.2011.168[published Online First: Epub Date]].
23. Zhou YY, Garrido T, Chin HL, et al. Patient access to an electronic health record with secure messaging: impact on primary care utilization. *The American journal of managed care* 2007;**13**(7):418-24
24. Coleman EA. Falling through the cracks: challenges and opportunities for improving transitional care for persons with continuous complex care needs. *Journal of the American Geriatrics Society* 2003;**51**(4):549-55
25. Wasson JH, Sauvigne AE, Mogielnicki RP, et al. Continuity of outpatient medical care in elderly men. A randomized trial. *JAMA : the journal of the American Medical Association* 1984;**252**(17):2413-7
26. van Walraven C, Oake N, Jennings A, et al. The association between continuity of care and outcomes: a systematic and critical review. *Journal of evaluation in clinical practice* 2010;**16**(5):947-56 doi: 10.1111/j.1365-2753.2009.01235.x[published Online First: Epub Date]].

1  
2  
3  
4  
5  
6  
7  
8  
9  
10  
11  
12  
13  
14  
15  
16  
17  
18  
19  
20  
21  
22  
23  
24  
25  
26  
27  
28  
29  
30  
31  
32  
33  
34  
35  
36  
37  
38  
39  
40  
41  
42  
43  
44  
45  
46  
47  
48  
49  
50  
51  
52  
53  
54  
55  
56  
57  
58  
59  
60

**Appendix 1:** List of questions from interview instrument

Tell me what happened to you since you went home between last discharge and now?

Do you think there is anything else that could have been done to have prevented you from coming back to hospital, and if so what?

When you have a change in your health at home, or start to feel sick at home, how do you make the decision to try to reach your PMD versus going to the ED?

How often do you try to reach your PMD as opposed to going to the ED?

When you have a change in your health at home, or start to feel sick at home, how long have you waited in the past before contacting your provider?

Can you tell me about the medications you take at home?

1  
2  
3 Has a financial barrier or problem ever resulted in you not being able to obtain the medications  
4 that you need? If so, tell me about it. Has this been a common problem for you?  
5  
6

7 How do you manage your medications at home?  
8

9 Do you have any difficulty with your medications?  
10

11 Tell me what it's like at home for you?  
12

13 Do you have people who can help you at home?  
14

15 Do you feel safe at home?  
16

17 How do you think of the social support you have at home?  
18

19 What is your financial situation?  
20

21 In what ways do you have difficulty getting to and from your primary care appointments, if at  
22 all?  
23

24 How do you get around?  
25

26 In the last couple of weeks, have you been feeling depressed?  
27

28 Have you ever been on any medications for depression?  
29

30 Do you feel like these feelings of depression have caused you to have to come to hospital more  
31 than you otherwise would have to?  
32

33 What's your relationship with your primary doctor at the Primary Care Center?  
34

35 Do you know the name of your PMD, and do you have difficulty reaching your primary doctor if  
36 you're having a problem?  
37

38 How can your primary doctor help to prevent you from having to be readmitted to the hospital do  
39 you think?  
40

41 Can you think of anything more your primary doctor, or the Primary Care Center here at Yale  
42 could do?  
43

44 What do you think are some other things that can be done to help prevent you from having to  
45 come back to the hospital, if anything?  
46

47 Is there anything else that you think that either you or the physicians in the community could do  
48 to help you with that?  
49

1  
2  
3 Do you need any more home support (home nursing care, VNA, etc) than you currently are  
4 receiving?  
5  
6

7 Finally, do you think it would be helpful for your primary doctor to call you at home to check in  
8 with you on a regular basis, and why?  
9  
10  
11  
12  
13  
14  
15  
16  
17  
18  
19  
20  
21  
22  
23  
24  
25  
26  
27  
28  
29  
30  
31  
32  
33  
34  
35  
36  
37  
38  
39  
40  
41  
42  
43  
44  
45  
46  
47  
48  
49  
50  
51  
52  
53  
54  
55  
56  
57  
58  
59  
60

For peer review only

## Consolidated criteria for reporting qualitative studies (COREQ): 32-item checklist

| No                                             | Item                                     | Guide questions/description                                                                                                                                                                                                   |
|------------------------------------------------|------------------------------------------|-------------------------------------------------------------------------------------------------------------------------------------------------------------------------------------------------------------------------------|
| <b>Domain 1: Research team and reflexivity</b> |                                          |                                                                                                                                                                                                                               |
| Personal Characteristics                       |                                          |                                                                                                                                                                                                                               |
| 1.                                             | Interviewer/facilitator                  | Which author/s conducted the interview or focus group?<br>Theodore Long                                                                                                                                                       |
| 2.                                             | Credentials                              | What were the researcher's credentials? <i>E.g. PhD, MD</i><br>MD                                                                                                                                                             |
| 3.                                             | Occupation                               | What was their occupation at the time of the study?<br>Internal Medicine resident                                                                                                                                             |
| 4.                                             | Gender                                   | Was the researcher male or female?<br>Male                                                                                                                                                                                    |
| 5.                                             | Experience and training                  | What experience or training did the researcher have?<br>Researcher received training from both Dr. Horwitz, who has extensive experience with qualitative interviewing, as well as relevant textbooks on qualitative studies. |
| Relationship with participants                 |                                          |                                                                                                                                                                                                                               |
| 6.                                             | Relationship established                 | Was a relationship established prior to study commencement?<br>No                                                                                                                                                             |
| 7.                                             | Participant knowledge of the interviewer | What did the participants know about the researcher? <i>e.g. personal goals, reasons for doing the research</i><br>Participants knew that the researcher was conducting interviews for the purpose of this research study.    |
| 8.                                             | Interviewer characteristics              | What characteristics were reported about the interviewer/facilitator? <i>e.g. Bias, assumptions, reasons and interests in the research topic</i><br>Researcher stated interest in research topic.                             |
| <b>Domain 2: study design</b>                  |                                          |                                                                                                                                                                                                                               |
| Theoretical framework                          |                                          |                                                                                                                                                                                                                               |
| 9.                                             | Methodological orientation and Theory    | What methodological orientation was stated to underpin the study? <i>e.g. grounded theory, discourse analysis, ethnography, phenomenology, content analysis</i><br>Grounded theory                                            |
| Participant selection                          |                                          |                                                                                                                                                                                                                               |
| 10.                                            | Sampling                                 | How were participants selected? <i>e.g. purposive, convenience, consecutive, snowball</i><br>Purposive                                                                                                                        |
| 11.                                            | Method of approach                       | How were participants approached? <i>e.g. face-to-face, telephone, mail, email</i><br>Face-to-face                                                                                                                            |
| 12.                                            | Sample size                              | How many participants were in the study?<br>17                                                                                                                                                                                |
| 13.                                            | Non-participation                        | How many people refused to participate or dropped out? Reasons?<br>4 patients refused, stating that they were not interested in                                                                                               |



| No  | Item                                   | Guide questions/description                                                                                                                                                         |
|-----|----------------------------------------|-------------------------------------------------------------------------------------------------------------------------------------------------------------------------------------|
|     |                                        | participating                                                                                                                                                                       |
|     | Setting                                |                                                                                                                                                                                     |
| 14. | Setting of data collection             | Where was the data collected? e.g. <i>home, clinic, workplace</i><br>Workplace                                                                                                      |
| 15. | Presence of non-participants           | Was anyone else present besides the participants and researchers?<br>No                                                                                                             |
| 16. | Description of sample                  | What are the important characteristics of the sample? e.g. <i>demographic data, date</i><br>No identifying information was used, we only used status as a primary care patient      |
|     | Data collection                        |                                                                                                                                                                                     |
| 17. | Interview guide                        | Were questions, prompts, guides provided by the authors?<br>Was it pilot tested?<br>The interview guide was iterative and tested through evaluating interviews sequentially.        |
| 18. | Repeat interviews                      | Were repeat interviews carried out? If yes, how many?<br>No                                                                                                                         |
| 19. | Audio/visual recording                 | Did the research use audio or visual recording to collect the data?<br>We used an audio recording device                                                                            |
| 20. | Field notes                            | Were field notes made during and/or after the interview or focus group?<br>No                                                                                                       |
| 21. | Duration                               | What was the duration of the interviews or focus group?<br>15 to 20 minutes per interview                                                                                           |
| 22. | Data saturation                        | Was data saturation discussed?<br>Yes, we felt that we reached theoretical saturation                                                                                               |
| 23. | Transcripts returned                   | Were transcripts returned to participants for comment and/or correction?<br>No                                                                                                      |
|     | <b>Domain 3: analysis and findings</b> |                                                                                                                                                                                     |
|     | Data analysis                          |                                                                                                                                                                                     |
| 24. | Number of data coders                  | How many data coders coded the data?<br>Three                                                                                                                                       |
| 25. | Description of the coding tree         | Did authors provide a description of the coding tree?<br>Yes                                                                                                                        |
| 26. | Derivation of themes                   | Were themes identified in advance or derived from the data?<br>Derived from data                                                                                                    |
| 27. | Software                               | What software, if applicable, was used to manage the data?<br>None                                                                                                                  |
| 28. | Participant checking                   | Did participants provide feedback on the findings?<br>No                                                                                                                            |
|     | Reporting                              |                                                                                                                                                                                     |
| 29. | Quotations presented                   | Were participant quotations presented to illustrate the themes / findings? Was each quotation identified? e.g. <i>participant number</i><br>Quotations were used but not identified |
| 30. | Data and findings consistent           | Was there consistency between the data presented and the findings?                                                                                                                  |

1  
2  
3  
4  
5  
6  
7  
8  
9  
10  
11  
12  
13  
14  
15  
16  
17  
18  
19  
20  
21  
22  
23  
24  
25  
26  
27  
28  
29  
30  
31  
32  
33  
34  
35  
36  
37  
38  
39  
40  
41  
42  
43  
44  
45  
46  
47  
48  
49  
50  
51  
52  
53  
54  
55  
56  
57  
58  
59  
60

| No  | Item                    | Guide questions/description                                                   |
|-----|-------------------------|-------------------------------------------------------------------------------|
|     |                         | Yes                                                                           |
| 31. | Clarity of major themes | Were major themes clearly presented in the findings?<br>Yes                   |
| 32. | Clarity of minor themes | Is there a description of diverse cases or discussion of minor themes?<br>Yes |

For peer review only



**Reasons for readmission in an underserved high-risk population: A qualitative analysis of a series of inpatient interviews**

|                                 |                                                                                                                                                                                                             |
|---------------------------------|-------------------------------------------------------------------------------------------------------------------------------------------------------------------------------------------------------------|
| Journal:                        | <i>BMJ Open</i>                                                                                                                                                                                             |
| Manuscript ID:                  | bmjopen-2013-003212.R2                                                                                                                                                                                      |
| Article Type:                   | Research                                                                                                                                                                                                    |
| Date Submitted by the Author:   | 11-Aug-2013                                                                                                                                                                                                 |
| Complete List of Authors:       | Long, Theodore; Yale School of Medicine, Internal Medicine<br>Genao, Ingina; Yale University School of Medicine, Internal Medicine<br>Horwitz, Leora; Yale University School of Medicine, Internal Medicine |
| <b>Primary Subject Heading</b>: | Qualitative research                                                                                                                                                                                        |
| Secondary Subject Heading:      | Health services research, Communication, General practice / Family practice                                                                                                                                 |
| Keywords:                       | Quality in health care < HEALTH SERVICES ADMINISTRATION & MANAGEMENT, PRIMARY CARE, QUALITATIVE RESEARCH                                                                                                    |
|                                 |                                                                                                                                                                                                             |

SCHOLARONE™  
Manuscripts

**Title:** Reasons for readmission in an underserved high-risk population: A qualitative analysis of a series of inpatient interviews

**Authors:** Theodore Long, MD;<sup>1,2</sup> Inginia Genao, MD;<sup>3</sup> Leora I. Horwitz, MD, MHS<sup>2-4</sup>

**Running Title:** High-Risk Readmissions

**Author affiliations:**

<sup>1</sup>Internal Medicine Residency Program, Department of Internal Medicine, Yale School of Medicine, New Haven, CT

<sup>2</sup>The Robert Wood Johnson Foundation Clinical Scholars Program, Yale School of Medicine, New Haven, CT

<sup>3</sup>Section of General Internal Medicine, Department of Internal Medicine, Yale School of Medicine, New Haven, CT

<sup>4</sup>Center for Outcomes Research and Evaluation, Yale-New Haven Hospital, New Haven, CT

Corresponding author:

Theodore Long, MD

Robert Wood Johnson Clinical Scholars Program

333 Cedar Street

SHM IE-61

PO Box 208088

New Haven, CT 06520

Tel: 203.785.4148

Fax: 203.785.3461

Word count: 3498

Tables: 4

Figures: 0

References: 28

Word count (abstract): 214

Key words: access to care, care transitions, underserved populations, qualitative research, primary care

## Abstract

Objective: To gather qualitative data to elucidate the reasons for readmissions in a high-risk population of underserved patients.

Design: We created an instrument with 27 open-ended questions based on current interventions.

Setting: Yale-New Haven Hospital.

Patients: Patients at the Yale Adult Primary Care Center (PCC).

Measurements: We conducted semi-structured qualitative interviews of patients who had four or more admissions in the previous six months and were currently readmitted to the hospital.

Results: We completed 17 interviews and identified themes relating to risk of readmission. We found that patients went directly to the Emergency Department (ED) when they experienced a change in health status without contacting their primary provider. Reasons for this included poor telephone or urgent care access and the belief that the PCC could not treat acute illness. Many patients could not name their primary provider. Conversely, every patient except one reported being able to obtain medications without undue financial burden, and every patient reported receiving adequate home care services.

Conclusions: These high-risk patients were receiving the formal services that they needed, but were making the decision to go to the ED because of inadequate access to care and fragmented primary care relationships. Formal transitional care services are unlikely to be adequate in reducing readmissions without also addressing primary care access and continuity.

## Article Summary

### Article Focus:

- We asked the question of what unique factors in the post-discharge experience for patients were contributing to readmissions in a high-risk urban underserved population
- We explored patient perceptions of areas of current interventions, including home services, medications, and transportation
- We propose interventions based on our findings, and compare our results to other studies looking at readmissions

### Key Messages:

- We found that there are factors contributing to readmissions that are not addressed by current intervention strategies
- In our high-risk population, there was a lack of primary care relationship and a tendency to delay seeking care that resulted in patients triaging themselves to the Emergency Department

### Strengths and Limitations of this Study:

- Limitations include this being a single site study with a focus on patients at the highest risk of readmission; thus findings may not be comparable to other populations
- Strengths include elucidating the perspectives of an underrepresented population of patients and defining key areas for intervention in this population

## Introduction

Hospital readmissions represent a significant cost to the healthcare system and are a burden to patients. Nationally, 19.6% of Medicare beneficiaries discharged from the hospital are readmitted within 30 days and 34.0% are readmitted within 90 days [1]. Many attempts have been made to identify and address the issues leading to readmission. However, no single strategy has been found to reproducibly reduce readmissions [2]. Most studies evaluating this problem have focused on chart review and administrative data, but there is a paucity of qualitative information from the perspectives of patients [3]. It has been unclear what happens to patients once they are discharged from the hospital, and whether their health care outside the hospital could be improved in order to prevent hospital readmissions.

This study examined patient experiences after hospital discharge by conducting qualitative interviews of high-risk patients during readmission. We studied the urban underserved population of patients at Yale-New Haven Hospital (YNHH) with the highest incidence of readmission. We chose to assess this population because the urban underserved comprise a disproportionate share of readmissions at many academic medical centers [4-7]. Furthermore, patients with low socioeconomic status have been shown to have a distinctly challenging experience transitioning from inpatient admission to home [8-10].

We sought to understand the perspectives of underserved patients at the highest risk of readmission in order to determine how future interventions could be more effective for this population. We examined their transition of care from the hospital to home, focusing on how they interacted with the health system once they left the hospital and what factors drove them to be readmitted so frequently.

## Methods

### *Setting*

We focused our study on the underserved population at YNHH, a 966 bed urban academic medical center. We interviewed patients cared for at the Yale Adult Primary Care Center (PCC), which is a hospital-based clinic serving primarily the low-income residents of New Haven. The PCC is staffed by internal medicine residents who are typically present for one half day per week as well as part and full time attending providers. Residents are assigned to the PCC for their entire three years of training.

### *Study Cohort*

Our study population was comprised of PCC patients with four or more admissions in the past six months, which is one of YNHH's criteria for high risk. At the time of this study, less than 150 patients at YNHH met this high-risk criterion, and of these 25% were PCC patients. We arranged for our medical record system to send a daily email listing all patients designated as high-risk currently admitted at YNHH. The criteria for this designation are either four or more admissions in the past six months or a diagnosis of heart failure. From the daily list, we identified patients who had four or more admissions in the past six months and who had an established primary care provider in the PCC as well as at least two completed clinic notes from the prior 12 months. We set out the requirement for at least two clinic notes to ensure that enrolled patients were actively followed by the PCC. We then restricted this group to patients who were currently readmitted within 30 days of their last date of discharge from YNHH. All interviews were conducted inpatient during the patients' readmission stays. We completed the study from October, 2011 to April, 2012. Interviews were completed on both weekdays and weekends. Twenty-one eligible patients were approached during the study period, and four



1  
2  
3 declined.

4  
5  
6 *Design*

7  
8 We created an instrument with 27 open-ended questions based on areas targeted by  
9  
10 current interventions as well as other qualitative studies looking at readmissions [3 11]. Given  
11  
12 that most interventions are focused on supporting the patient in the post-discharge period, we  
13  
14 focused our study on understanding the patient experience of several key support domains:  
15  
16 social/emotional support (from friends, family, and clinicians), instrumental health system  
17  
18 support (medications, transportation, access to outpatient care), and informational support  
19  
20 (knowledge and self-efficacy) [12]. We then conducted pilot interviews and solicited feedback  
21  
22 about the interview questions from patients. The instrument was revised based on this feedback.  
23  
24 We also extensively reviewed the first complete interview transcription, and further revised the  
25  
26 instrument based on this feedback as well. The final questions in the instrument included the  
27  
28 areas of transportation, support systems, medications, formal services, health literacy, access to  
29  
30 care, relationship with provider, communication with providers, and transitions of care (see  
31  
32 Appendix 1 for list of questions). For questions asking for an affirmative/negative or numerical  
33  
34 response, we used a strategy of planned prompts and probes to extend the narrative. We also  
35  
36 included screening for depression via the Patient Health Questionnaire-2 (PHQ-2) [13] and for  
37  
38 unhealthy alcohol use via the National Institute on Alcohol Abuse and Alcoholism (NIAAA)  
39  
40 recommended tool [14]. The IRB waived the written consent requirement due to the fact that no  
41  
42 identifying information was used. Informed consent was obtained verbally from all study  
43  
44 participants. One investigator (T.L.) conducted semi-structured interviews. The interviews were  
45  
46 recorded and then transcribed by a subcontracted transcriber.  
47  
48  
49  
50  
51  
52  
53

54  
55 *Analysis*

1  
2  
3  
4  
5  
6  
7  
8  
9  
10  
11  
12  
13  
14  
15  
16  
17  
18  
19  
20  
21  
22  
23  
24  
25  
26  
27  
28  
29  
30  
31  
32  
33  
34  
35  
36  
37  
38  
39  
40  
41  
42  
43  
44  
45  
46  
47  
48  
49  
50  
51  
52  
53  
54

Three investigators (T.L., I.G., L.H.) independently generated codes from the primary transcriptions. The codes represented themes found in the data. The investigators initially coded the first four transcriptions independently and then reviewed the coding scheme and resolved discrepancies collaboratively. The transcriptions were saved as Microsoft Word documents, with codes being tracked as Comments within these documents. This process was repeated two more times, with all transcriptions being coded independently and then meeting to come to a group consensus. It was decided ahead of time that transcriptions would be coded until theoretical saturation was reached and no new codes were being introduced in the interviews. A final code list was developed using the constant comparative method [15]. The codes were organized into 11 main themes.

## Results

35  
36  
37  
38  
39  
40  
41  
42  
43  
44  
45  
46  
47  
48  
49  
50  
51  
52  
53  
54

Thirty-six patients met inclusion criteria at the onset of the study. Of the 36 patients, 21 eligible patients were approached, and four declined. We completed 17 interviews (11 women, 6 men). On average, the interviews were 15 to 20 minutes long. For the overall cohort of 36 patients meeting inclusion criteria, patient characteristics are provided in Table 1. When patients presented to the ED, 67% of the time they were admitted to the hospital (see Table 2 for hospital admission and ED diagnoses). Patients also had multiple visits to the PCC and the ED (Table 3). Sixteen of the 17 patients we interviewed screened negative for unhealthy alcohol use per the NIAAA tool and 47% had a positive screen for depression per the PHQ-2.

**Table 1:** Patient Characteristics for Cohort Meeting Inclusion Criteria (N=36)

| <i>Age</i> | <i>Number (%)</i> |
|------------|-------------------|
| 19 to 39   | 10 (28)           |

|                         |         |
|-------------------------|---------|
| 40 to 64                | 18 (50) |
| 65 or above             | 8 (22)  |
| <i>Race/Ethnicity</i>   |         |
| Hispanic                | 8 (22)  |
| Black                   | 16 (44) |
| White                   | 11 (31) |
| Other                   | 1 (3)   |
| <i>Insurance Status</i> |         |
| Medicaid only           | 15 (42) |
| Medicare only           | 1 (3)   |
| Medicaid and Medicare   | 16 (44) |
| Self-pay                | 1 (3)   |
| Other                   | 3 (8)   |

**Table 2:** Most Common Diagnoses for ED Visits and Hospital Admissions in 2011

| <i>ED Visit Diagnosis</i>            | <i>Hospital Admission Diagnosis</i>  |
|--------------------------------------|--------------------------------------|
| Abdominal pain (16%)                 | Abdominal pain (12%)                 |
| Chest pain (9%)                      | Nausea/Vomiting, Abdominal pain (9%) |
| Nausea/Vomiting, Abdominal pain (9%) | COPD exacerbation (8%)               |
| COPD exacerbation (5%)               | Shortness of breath (6%)             |
| GI bleed (4%)                        | Congestive heart failure (6%)        |
| Other (43%)                          | Other (59%)                          |

**Table 3:** PCC and ED Utilization

| <i>Primary Care and ED Characteristics</i>         | N=36    |
|----------------------------------------------------|---------|
| Medications, mean                                  | 12.0    |
| Polypharmacy (>6 medications), n (%)               | 30 (83) |
| Number of patient diagnoses (comorbidity), mean    | 7.1     |
| ED visits in 2011, mean                            | 6.6     |
| Number of follow-up appointments made with PCC     | 66      |
| Number of follow-up appointments kept              | 29      |
| Number of patients using behavioral health, n (%)  | 5 (14)  |
| Average number of PCC visits in the last 12 months | 4.3     |

We identified 11 themes (Table 4), and describe five relating to risk of readmission: fragmented primary care relationships contributing to avoidance of ambulatory care, self triage leading to potentially avoidable ED use, adequacy of formal services, heavy reliance on informal

support systems, and inadequate access to care. The codes contributing to these five themes were consistent throughout the interviews and pertained to either reasons for readmission or current interventions targeted at decreasing readmissions. The other themes represented self-reported descriptions, such as substance abuse for the theme of patient characteristics. Overall, we found that while patients described receiving adequate formal services, barriers in accessing care and disjointed primary care relationships led to patients making their own triage decisions and seeking other support systems.

**Table 4:** 11 Main Themes

|                                                                                    |
|------------------------------------------------------------------------------------|
| Heavy Reliance on Informal Support Systems                                         |
| Adequacy of Formal Services                                                        |
| Health Literacy                                                                    |
| Inadequate Access to Care                                                          |
| Fragmented Primary Care Relationships Contributing to Avoidance of Ambulatory Care |
| Self Triage Leading to Potentially Avoidable ED Use                                |
| Patient Phone Call                                                                 |
| Discharge Planning                                                                 |
| Patient Characteristics                                                            |
| Readmissions (same or different complaint)                                         |
| Post-Discharge Course                                                              |

### *Fragmented Primary Care Relationships Contributing to Avoidance of Ambulatory Care*

Participants described a fragmented relationship with their providers. Nine patients were able to name their primary provider, while seven patients were unable to. In terms of their connection with their provider, many expressed concern: “I ain’t got no relationship. I don’t even know the person. They don’t even know me. There was no relationship.”

Patients further referred to provider turnover and large provider teams as deleterious to developing a relationship with their providers. One patient explained: “Well, I hate that they keep switching doctors. They can’t really keep the same doctor because as soon as you get comfortable with one person they’ll let you know somebody else is there. Now it’s like you got to learn this person all over. I hate changing doctors. I don’t like that.” Another patient described improving the relationship with her primary provider, stating “It [would] make me feel better knowing that somebody cares [...] They could give advice on the phone telling me what I should do. And I could do that to prevent going to the hospital because I’m in the hospital a lot.”

### *Self Triage Leading to Potentially Avoidable ED Use*

We found that patients were typically going directly to the Emergency Department (ED) without contacting their primary care provider: “I could tell the pain, if it is severe enough to go to the PCC and sit around to be called in the clinic or do I need to just get out there and go right to the emergency room. So I could tell the difference, I learned to know my body now after getting so sick and the last three years I’ve been very sick.”

Patients commonly cited inability to reach their primary provider via telephone and the belief that the PCC could not treat acute illness as reasons for going directly to the ED. One patient explained that “I know that once I get there [to the PCC], they would send me anyway so

1  
2  
3 I might just as well go to the [ED] first.”  
4

5  
6 Finally, amongst patients who decided to go to the ED instead of going for an urgent  
7  
8 primary care visit, a common theme was delaying action until the situation became more serious.  
9  
10 One patient commented “I wait[ed] instead to get better [...] my head was pounding and when I  
11  
12 walked to the bathroom I'd be staggering [...] I mashed my lifeline, and the ambulance picked  
13  
14 me up.”  
15

### 16 17 *Adequacy of Formal Services* 18

19  
20 We found that patients had limited or no difficulty accessing formal services such as  
21  
22 medication assistance, home care, and transportation. All patients except one were able to obtain  
23  
24 medications either despite financial barriers or with no financial barriers. One patient noted “I  
25  
26 got medical and they basically pay for [medications].” Patients similarly found home care  
27  
28 accessible, describing “Well, I have a nurse coming usually once a week and more often if there  
29  
30 is something going on.” Formal transportation was obtained with minimal difficulty, with one  
31  
32 patient explaining “They have a car that gets me [...] I have to call and make an appointment and  
33  
34 they would call people telling them two days in advance.”  
35  
36  
37

### 38 39 *Heavy Reliance on Informal Support Systems* 40

41  
42 Despite the widespread availability and use of formal post-discharge support systems,  
43  
44 patients reported still relying heavily on informal support from friends and family members to  
45  
46 help with transportation and medication management. One patient described “So my daughter  
47  
48 sets them out now so it makes it easier for the visit nurse, so that’s how I manage my medication  
49  
50 at home. They put it in a little blue container and my daughter sets them up by the week.”  
51  
52 Another patient commented “If I can’t move, my family give me a ride - my daughter, my man,  
53  
54 my niece, my nephew, my son.” Patients demonstrated resilient attitudes based on the high  
55  
56  
57  
58  
59  
60

1  
2  
3 degree of support they received from friends and family members, and notably described that  
4 they did not feel lonely or socially isolated despite spending a great deal of time in the hospital.  
5  
6

7  
8 Patients also reported feeling safe at home.  
9

### 10 *Inadequate Access to Care*

11  
12 The most commonly cited problem inhibiting patients from accessing medical care was  
13 an impaired ability to speak to their provider on the telephone. This was described as both  
14 difficulty in reaching someone on the phone as well as long waiting times before receiving a call  
15 back from a provider. As one patient noted, “I don’t call primary care because it takes too long to  
16 get through to anybody until you get the call – I could have gone on a trip to Europe and back.”  
17  
18  
19  
20  
21  
22  
23

24 Patients also noted that they had stopped even trying to call based on prior experiences:  
25  
26 “I try to call the Primary Care Center. But it’s like that one time that took 7 hours. I haven’t  
27 called them [since]. So it’s like either I stick it out and let the pain or whatever subside, or I go  
28 down to the ER. If I called them one time and it took them some hours to get back to me, I feel  
29 that it’s useless if I call again.”  
30  
31  
32  
33  
34  
35

### 36 **Discussion**

37  
38 In this study of underserved patients with a high frequency of hospital readmissions, we  
39 found that there may be factors contributing to readmissions that are not addressed by most  
40 current interventions, which typically target access to formal outpatient services [3 16 17].  
41  
42  
43  
44  
45  
46  
47  
48  
49  
50  
51  
52  
53  
54  
55  
56  
57  
58  
59  
60  
61  
62  
63  
64  
65  
66  
67  
68  
69  
70  
71  
72  
73  
74  
75  
76  
77  
78  
79  
80  
81  
82  
83  
84  
85  
86  
87  
88  
89  
90  
91  
92  
93  
94  
95  
96  
97  
98  
99  
100  
101  
102  
103  
104  
105  
106  
107  
108  
109  
110  
111  
112  
113  
114  
115  
116  
117  
118  
119  
120  
121  
122  
123  
124  
125  
126  
127  
128  
129  
130  
131  
132  
133  
134  
135  
136  
137  
138  
139  
140  
141  
142  
143  
144  
145  
146  
147  
148  
149  
150  
151  
152  
153  
154  
155  
156  
157  
158  
159  
160  
161  
162  
163  
164  
165  
166  
167  
168  
169  
170  
171  
172  
173  
174  
175  
176  
177  
178  
179  
180  
181  
182  
183  
184  
185  
186  
187  
188  
189  
190  
191  
192  
193  
194  
195  
196  
197  
198  
199  
200  
201  
202  
203  
204  
205  
206  
207  
208  
209  
210  
211  
212  
213  
214  
215  
216  
217  
218  
219  
220  
221  
222  
223  
224  
225  
226  
227  
228  
229  
230  
231  
232  
233  
234  
235  
236  
237  
238  
239  
240  
241  
242  
243  
244  
245  
246  
247  
248  
249  
250  
251  
252  
253  
254  
255  
256  
257  
258  
259  
260  
261  
262  
263  
264  
265  
266  
267  
268  
269  
270  
271  
272  
273  
274  
275  
276  
277  
278  
279  
280  
281  
282  
283  
284  
285  
286  
287  
288  
289  
290  
291  
292  
293  
294  
295  
296  
297  
298  
299  
300  
301  
302  
303  
304  
305  
306  
307  
308  
309  
310  
311  
312  
313  
314  
315  
316  
317  
318  
319  
320  
321  
322  
323  
324  
325  
326  
327  
328  
329  
330  
331  
332  
333  
334  
335  
336  
337  
338  
339  
340  
341  
342  
343  
344  
345  
346  
347  
348  
349  
350  
351  
352  
353  
354  
355  
356  
357  
358  
359  
360  
361  
362  
363  
364  
365  
366  
367  
368  
369  
370  
371  
372  
373  
374  
375  
376  
377  
378  
379  
380  
381  
382  
383  
384  
385  
386  
387  
388  
389  
390  
391  
392  
393  
394  
395  
396  
397  
398  
399  
400  
401  
402  
403  
404  
405  
406  
407  
408  
409  
410  
411  
412  
413  
414  
415  
416  
417  
418  
419  
420  
421  
422  
423  
424  
425  
426  
427  
428  
429  
430  
431  
432  
433  
434  
435  
436  
437  
438  
439  
440  
441  
442  
443  
444  
445  
446  
447  
448  
449  
450  
451  
452  
453  
454  
455  
456  
457  
458  
459  
460  
461  
462  
463  
464  
465  
466  
467  
468  
469  
470  
471  
472  
473  
474  
475  
476  
477  
478  
479  
480  
481  
482  
483  
484  
485  
486  
487  
488  
489  
490  
491  
492  
493  
494  
495  
496  
497  
498  
499  
500  
501  
502  
503  
504  
505  
506  
507  
508  
509  
510  
511  
512  
513  
514  
515  
516  
517  
518  
519  
520  
521  
522  
523  
524  
525  
526  
527  
528  
529  
530  
531  
532  
533  
534  
535  
536  
537  
538  
539  
540  
541  
542  
543  
544  
545  
546  
547  
548  
549  
550  
551  
552  
553  
554  
555  
556  
557  
558  
559  
560  
561  
562  
563  
564  
565  
566  
567  
568  
569  
570  
571  
572  
573  
574  
575  
576  
577  
578  
579  
580  
581  
582  
583  
584  
585  
586  
587  
588  
589  
590  
591  
592  
593  
594  
595  
596  
597  
598  
599  
600  
601  
602  
603  
604  
605  
606  
607  
608  
609  
610  
611  
612  
613  
614  
615  
616  
617  
618  
619  
620  
621  
622  
623  
624  
625  
626  
627  
628  
629  
630  
631  
632  
633  
634  
635  
636  
637  
638  
639  
640  
641  
642  
643  
644  
645  
646  
647  
648  
649  
650  
651  
652  
653  
654  
655  
656  
657  
658  
659  
660  
661  
662  
663  
664  
665  
666  
667  
668  
669  
670  
671  
672  
673  
674  
675  
676  
677  
678  
679  
680  
681  
682  
683  
684  
685  
686  
687  
688  
689  
690  
691  
692  
693  
694  
695  
696  
697  
698  
699  
700  
701  
702  
703  
704  
705  
706  
707  
708  
709  
710  
711  
712  
713  
714  
715  
716  
717  
718  
719  
720  
721  
722  
723  
724  
725  
726  
727  
728  
729  
730  
731  
732  
733  
734  
735  
736  
737  
738  
739  
740  
741  
742  
743  
744  
745  
746  
747  
748  
749  
750  
751  
752  
753  
754  
755  
756  
757  
758  
759  
760  
761  
762  
763  
764  
765  
766  
767  
768  
769  
770  
771  
772  
773  
774  
775  
776  
777  
778  
779  
780  
781  
782  
783  
784  
785  
786  
787  
788  
789  
790  
791  
792  
793  
794  
795  
796  
797  
798  
799  
800  
801  
802  
803  
804  
805  
806  
807  
808  
809  
810  
811  
812  
813  
814  
815  
816  
817  
818  
819  
820  
821  
822  
823  
824  
825  
826  
827  
828  
829  
830  
831  
832  
833  
834  
835  
836  
837  
838  
839  
840  
841  
842  
843  
844  
845  
846  
847  
848  
849  
850  
851  
852  
853  
854  
855  
856  
857  
858  
859  
860  
861  
862  
863  
864  
865  
866  
867  
868  
869  
870  
871  
872  
873  
874  
875  
876  
877  
878  
879  
880  
881  
882  
883  
884  
885  
886  
887  
888  
889  
890  
891  
892  
893  
894  
895  
896  
897  
898  
899  
900  
901  
902  
903  
904  
905  
906  
907  
908  
909  
910  
911  
912  
913  
914  
915  
916  
917  
918  
919  
920  
921  
922  
923  
924  
925  
926  
927  
928  
929  
930  
931  
932  
933  
934  
935  
936  
937  
938  
939  
940  
941  
942  
943  
944  
945  
946  
947  
948  
949  
950  
951  
952  
953  
954  
955  
956  
957  
958  
959  
960  
961  
962  
963  
964  
965  
966  
967  
968  
969  
970  
971  
972  
973  
974  
975  
976  
977  
978  
979  
980  
981  
982  
983  
984  
985  
986  
987  
988  
989  
990  
991  
992  
993  
994  
995  
996  
997  
998  
999  
1000

55 While other studies have examined the challenges in transitions from inpatient care [8

1  
2  
3 18], we explored how patients interacted with the health system when they were home. We  
4  
5 found that patients delayed care and then made the decision to go to the ED without attempting  
6  
7 to contact their primary providers. Delays in care may have increased risk for readmission. The  
8  
9 most consistent reasons for not reaching out to their primary providers were inability to speak  
10  
11 with a provider on the phone, the belief that their primary care provider could not manage urgent  
12  
13 issues, and patient perception that their primary care provider could not address their concerns in  
14  
15 a timely manner.  
16  
17  
18

19  
20 Our results differ from other qualitative studies evaluating readmissions. In a recent  
21  
22 article by Strunin et al (2007), patients expressed that they had inadequate medical care at home  
23  
24 and lacked transportation to appointments [3]. In contrast, we found that these needs were being  
25  
26 met for our high-risk patients. Similarly, a recent survey by Kangovi et al (2012) of patients that  
27  
28 had been readmitted found that lack of medication adherence after discharge was commonly  
29  
30 attributed to difficulty paying for medications and obtaining transportation [8]. In our sample of  
31  
32 patients, only one patient reported not being able to obtain medications due to cost. Although  
33  
34 other studies have included patients with one or more readmission within 30 days of discharge,  
35  
36 we utilized more stringent enrollment criteria, requiring patients to have had four or more  
37  
38 admissions in the prior six months. The high-risk underserved patients that we enrolled may have  
39  
40 had more interaction with the hospital system than other patients with fewer hospital admissions,  
41  
42 and therefore may have had more opportunity to be linked in with formal services such as  
43  
44 medication assistance, visiting nurse services, and transportation arranged through the hospital.  
45  
46 However, future studies will be needed to determine if there is indeed a direct association  
47  
48 between increased interaction with the hospital system and increased formal services compared  
49  
50 to other patient populations.  
51  
52  
53  
54  
55  
56  
57  
58  
59  
60



1  
2  
3  
4  
5  
6 Our findings suggest that this population of patients needs more targeted interventions to  
7  
8 address the consistently stated problems of self triage and a lack of primary care relationship.  
9

10 Another recent study by Kangovi et al (2013) described a social norm of high-risk patients  
11 preferring the hospital for care when they have a change in their health status [19]. They  
12  
13 similarly conclude that targeted interventions should address the needs of high-risk patients in  
14  
15 the ambulatory setting.  
16  
17  
18

19  
20 First, improving telephone access to primary care offices is important, as many primary  
21  
22 care patients prefer this method of communication, and it is linked to improved patient outcomes  
23  
24 [20-22]. An effective telephone system would triage urgent issues, and would ensure that a  
25  
26 member of the patient's provider team is available to field urgent calls. Patients in our study  
27  
28 commonly mentioned that they wanted to receive a timely call back for urgent issues. Open  
29  
30 access scheduling, which minimizes scheduled appointments to maximize same-day visit  
31  
32 availability, typically also improves telephone access by opening up the calendar and  
33  
34 streamlining the types of appointments that can be made. The time taken per call is consequently  
35  
36 shorter [23 24]. Alternatively, many new electronic medical record systems allow secure  
37  
38 messaging through the electronic medical record, thereby reducing demand for telephone access,  
39  
40 and facilitating timely responses to urgent calls [25 26]. Future research regarding the best  
41  
42 modes of communication with providers will be an important area of inquiry moving forward.  
43  
44  
45  
46  
47

48 Second, many patients in our study had stopped calling their primary care provider  
49  
50 because of their perceptions of the primary care clinic as incapable of handling acute medical  
51  
52 concerns. Patient experiences, such as being transferred from their primary care office to the ED,  
53  
54 shaped their perception of the primary care clinic. Once access to providers has been improved  
55  
56  
57  
58  
59  
60

1  
2  
3 and the lack of primary care relationship has been repaired, we would suggest educating patients  
4  
5 about the scope of their primary care clinics as urgent care centers, as well as the role of their  
6  
7 primary providers in their care when they have a change in their health status. In addition,  
8  
9 providers should discuss their role in helping patients make triage decisions when they get sick at  
10  
11 home.  
12  
13

14  
15 Third, patients in our study described inadequate continuity with their providers. Patient-  
16  
17 provider continuity has been consistently associated with improved patient outcomes and  
18  
19 satisfaction [27 28]. To address the lack of primary care relationship that patients described,  
20  
21 there must first be a system in place that enables patients to have continuity with their teams  
22  
23 when they have a change in their health status [10]. This is especially difficult in clinics staffed  
24  
25 by residents who are present one half day per week, which is a common model for internal  
26  
27 medicine residency programs. When patients have urgent issues that arise, they are often seen by  
28  
29 providers who are not part of their primary care team. A strategy for improving upon this  
30  
31 situation would be to arrange residents into practice-partner teams where they would work  
32  
33 together to care for a larger panel of patients. While the patients would still need to become  
34  
35 familiar with a team of resident physicians, this has the potential to make patients feel more  
36  
37 comfortable seeking care for acute issues. This team-based care would also aid in the conversion  
38  
39 of primary care clinics to patient-centered medical homes, where continuity is an essential tenet.  
40  
41  
42  
43  
44

45  
46 Our study has several limitations. First, we focused on an underserved population; our  
47  
48 results may not apply to other populations. Second, our sample size is small, though we did  
49  
50 employ a comprehensive strategy to identify patients meeting our enrollment criteria during the  
51  
52 study period, and we did reach theoretical saturation as evidenced by no new themes being  
53  
54 introduced in the final interviews. Third, we conducted our study at a single site, and there may  
55  
56  
57  
58  
59  
60

1  
2  
3 be other factors more prevalent at other sites contributing to readmission.  
4

5  
6 In summary, we found that even though patients were receiving the formal services that  
7  
8 they needed, they were still being driven to make the decision to go to the ED based on based on  
9  
10 long phone wait times for primary care and their belief or experience that primary care cannot  
11  
12 treat their acute problems. We propose that educating patients about the capability and role of the  
13  
14 primary care provider while concurrently streamlining telephone access to providers could  
15  
16 enhance continuity and thereby prevent readmissions. Focusing entirely on arranging formal  
17  
18 transitional care services, such as transportation and medications, is unlikely to be adequate in  
19  
20 reducing readmissions.  
21  
22  
23  
24  
25  
26  
27  
28  
29  
30  
31  
32  
33  
34  
35  
36  
37  
38  
39  
40  
41  
42  
43  
44  
45  
46  
47  
48  
49  
50  
51  
52  
53  
54  
55  
56  
57  
58  
59  
60

## Acknowledgements

*Funders:* Dr. Horwitz is supported by the National Institute on Aging (K08 AG038336) and by the American Federation for Aging Research through the Paul B. Beeson Career Development Award Program. This work was also supported by a grant from the Claude D. Pepper Older Americans Independence Center at Yale University School of Medicine (P30AG021342 NIH/NIA). No funding source had any role in the study design; in the collection, analysis, and interpretation of data; in the writing of the report; or in the decision to submit the article for publication. The content is solely the responsibility of the authors and does not necessarily represent the official views of the National Institute on Aging, the National Institutes of Health, or the American Federation for Aging Research.

*Access to data:* Leora Horwitz had full access to all of the data in the study and takes responsibility for the integrity of the data and the accuracy of the data analysis.

*Prior presentations:* An earlier version of this work was presented as an oral presentation at the Society of General Internal Medicine Annual Meeting in Orlando, FL on May 12, 2012.

*Conflicts of interest:* The authors have no conflicts of interest to report.

*Contributorship:* The three authors are justifiably credited with authorship, according to the authorship criteria of ICMJE guidelines. Theodore Long: project management, conception, design, analysis and interpretation of data, drafting of the manuscript, final approval given; all remaining authors: conception and design, analysis, critical revision of manuscript, final approval given.

*Data sharing:* We have no additional unpublished data that has been made available to other parties.

## References

1. Jencks SF, Williams MV, Coleman EA. Rehospitalizations among patients in the Medicare fee-for-service program. *The New England journal of medicine* 2009;**360**(14):1418-28 doi: 10.1056/NEJMsa0803563[published Online First: Epub Date]].
2. Hansen LO, Young RS, Hinami K, et al. Interventions to reduce 30-day rehospitalization: a systematic review. *Annals of internal medicine* 2011;**155**(8):520-8 doi: 10.1059/0003-4819-155-8-201110180-00008[published Online First: Epub Date]].
3. Strunin L, Stone M, Jack B. Understanding rehospitalization risk: can hospital discharge be modified to reduce recurrent hospitalization? *J Hosp Med* 2007;**2**(5):297-304
4. Weissman JS, Stern RS, Epstein AM. The impact of patient socioeconomic status and other social factors on readmission: a prospective study in four Massachusetts hospitals. *Inquiry : a journal of medical care organization, provision and financing* 1994;**31**(2):163-72
5. Billings J, Zeitel L, Lukomnik J, et al. Impact of socioeconomic status on hospital use in New York City. *Health affairs (Project Hope)* 1993;**12**(1):162-73
6. Kalra AD, Fisher RS, Axelrod P. Decreased length of stay and cumulative hospitalized days despite increased patient admissions and readmissions in an area of urban poverty. *Journal of general internal medicine* 2010;**25**(9):930-5 doi: 10.1007/s11606-010-1370-5[published Online First: Epub Date]].
7. Allaudeen N, Vidyarthi A, Maselli J, et al. Redefining readmission risk factors for general medicine patients. *Journal of hospital medicine : an official publication of the Society of Hospital Medicine* 2011;**6**(2):54-60 doi: 10.1002/jhm.805[published Online First: Epub Date]].
8. Kangovi S, Grande D, Meehan P, et al. Perceptions of readmitted patients on the transition from hospital to home. *Journal of hospital medicine : an official publication of the Society of Hospital Medicine* 2012;**7**(9):709-12 doi: 10.1002/jhm.1966[published Online First: Epub Date]].
9. Raven MC, Billings JC, Goldfrank LR, Manheimer ED, Gourevitch MN. Medicaid patients at high risk for frequent hospital admission: real-time identification and remediable risks. *Journal of urban health : bulletin of the New York Academy of Medicine* 2009;**86**(2):230-41 doi: 10.1007/s11524-008-9336-1[published Online First: Epub Date]].
10. Englander H, Kansagara D. Planning and designing the care transitions innovation (C-Train) for uninsured and Medicaid patients. *Journal of hospital medicine : an official publication of the Society of Hospital Medicine* 2012;**7**(7):524-9 doi: 10.1002/jhm.1926[published Online First: Epub Date]].
11. Annema C, Luttik ML, Jaarsma T. Reasons for readmission in heart failure: Perspectives of patients, caregivers, cardiologists, and heart failure nurses. *Heart & lung : the journal of critical care* 2009;**38**(5):427-34 doi: 10.1016/j.hrtlng.2008.12.002[published Online First: Epub Date]].
12. Cohen S, Wills TA. Stress, social support, and the buffering hypothesis. *Psychological bulletin* 1985;**98**(2):310-57
13. Kroenke K, Spitzer RL, Williams JB. The Patient Health Questionnaire-2: validity of a two-item depression screener. *Medical care* 2003;**41**(11):1284-92 doi: 10.1097/01.mlr.0000093487.78664.3c[published Online First: Epub Date]].
14. Smith PC, Schmidt SM, Allensworth-Davies D, et al. Primary care validation of a single-question alcohol screening test. *Journal of general internal medicine* 2009;**24**(7):783-8 doi: 10.1007/s11606-009-0928-6[published Online First: Epub Date]].
15. Glaser BG, Strauss AL. *The Discovery of Grounded Theory: Strategies for Qualitative Research*. New York: Aldine, 1967.
16. Boling PA. Care transitions and home health care. *Clinics in geriatric medicine* 2009;**25**(1):135-48, viii doi: 10.1016/j.cger.2008.11.005[published Online First: Epub Date]].

17. Pearson S, Inglis SC, McLennan SN, et al. Prolonged effects of a home-based intervention in patients with chronic illness. *Archives of internal medicine* 2006;**166**(6):645-50 doi: 10.1001/archinte.166.6.645[published Online First: Epub Date]].
18. Davis MM, Devoe M, Kansagara D, Nicolaidis C, Englander H. "Did I do as best as the system would let me?" Healthcare professional views on hospital to home care transitions. *Journal of general internal medicine* 2012;**27**(12):1649-56 doi: 10.1007/s11606-012-2169-3[published Online First: Epub Date]].
19. Kangovi S, Barg FK, Carter T, Long JA, Shannon R, Grande D. Understanding why patients of low socioeconomic status prefer hospitals over ambulatory care. *Health affairs* 2013;**32**(7):1196-203 doi: 10.1377/hlthaff.2012.0825[published Online First: Epub Date]].
20. LaVela SL, Schectman G, Gering J, et al. Understanding health care communication preferences of veteran primary care users. *Patient education and counseling* 2012;**88**(3):420-6 doi: 10.1016/j.pec.2012.06.004[published Online First: Epub Date]].
21. Wasson J, Gaudette C, Whaley F, et al. Telephone care as a substitute for routine clinic follow-up. *JAMA : the journal of the American Medical Association* 1992;**267**(13):1788-93
22. Curry SJ, McBride C, Grothaus LC, et al. A randomized trial of self-help materials, personalized feedback, and telephone counseling with nonvolunteer smokers. *Journal of consulting and clinical psychology* 1995;**63**(6):1005-14
23. Steinbauer JR, Korell K, Erdin J, et al. Implementing open-access scheduling in an academic practice. *Family practice management* 2006;**13**(3):59-64
24. Rose KD, Ross JS, Horwitz LI. Advanced access scheduling outcomes: a systematic review. *Arch Intern Med* 2011;**171**(13):1150-9 doi: 10.1001/archinternmed.2011.168[published Online First: Epub Date]].
25. Zhou YY, Garrido T, Chin HL, et al. Patient access to an electronic health record with secure messaging: impact on primary care utilization. *The American journal of managed care* 2007;**13**(7):418-24
26. Coleman EA. Falling through the cracks: challenges and opportunities for improving transitional care for persons with continuous complex care needs. *Journal of the American Geriatrics Society* 2003;**51**(4):549-55
27. Wasson JH, Sauvigne AE, Mogielnicki RP, et al. Continuity of outpatient medical care in elderly men. A randomized trial. *JAMA : the journal of the American Medical Association* 1984;**252**(17):2413-7
28. van Walraven C, Oake N, Jennings A, et al. The association between continuity of care and outcomes: a systematic and critical review. *Journal of evaluation in clinical practice* 2010;**16**(5):947-56 doi: 10.1111/j.1365-2753.2009.01235.x[published Online First: Epub Date]].

1  
2  
3  
4  
5  
6  
7 **Appendix 1:** List of questions from interview instrument  
8

9 Tell me what happened to you since you went home between last discharge and now?  
10

11 Do you think there is anything else that could have been done to have prevented you from  
12 coming back to hospital, and if so what?  
13

14 When you have a change in your health at home, or start to feel sick at home, how do you make  
15 the decision to try to reach your PMD versus going to the ED?  
16  
17

18 How often do you try to reach your PMD as opposed to going to the ED?  
19

20 When you have a change in your health at home, or start to feel sick at home, how long have you  
21 waited in the past before contacting your provider?  
22  
23

24 Can you tell me about the medications you take at home?  
25

26 Has a financial barrier or problem ever resulted in you not being able to obtain the medications  
27 that you need? If so, tell me about it. Has this been a common problem for you?  
28  
29

30 How do you manage your medications at home?  
31

32 Do you have any difficulty with your medications?  
33  
34

35 Tell me what it's like at home for you?  
36

37 Do you have people who can help you at home?  
38

39 Do you feel safe at home?  
40

41 How do you think of the social support you have at home?  
42  
43

44 What is your financial situation?  
45

46 In what ways do you have difficulty getting to and from your primary care appointments, if at  
47 all?  
48  
49

50 How do you get around?  
51

52 In the last couple of weeks, have you been feeling depressed?  
53  
54

55 Have you ever been on any medications for depression?  
56  
57  
58  
59  
60

1  
2  
3 Do you feel like these feelings of depression have caused you to have to come to hospital more  
4 than you otherwise would have to?  
5

6  
7 What's your relationship with your primary doctor at the Primary Care Center?  
8

9 Do you know the name of your PMD, and do you have difficulty reaching your primary doctor if  
10 you're having a problem?  
11

12 How can your primary doctor help to prevent you from having to be readmitted to the hospital do  
13 you think?  
14

15  
16 Can you think of anything more your primary doctor, or the Primary Care Center here at Yale  
17 could do?  
18

19  
20 What do you think are some other things that can be done to help prevent you from having to  
21 come back to the hospital, if anything?  
22

23 Is there anything else that you think that either you or the physicians in the community could do  
24 to help you with that?  
25

26  
27 Do you need any more home support (home nursing care, VNA, etc) than you currently are  
28 receiving?  
29

30 Finally, do you think it would be helpful for your primary doctor to call you at home to check in  
31 with you on a regular basis, and why?  
32  
33  
34  
35  
36  
37  
38  
39  
40  
41  
42  
43  
44  
45  
46  
47  
48  
49  
50  
51  
52  
53  
54  
55  
56  
57  
58  
59  
60



**Title:** Reasons for readmission in an underserved high-risk population: A qualitative analysis of a series of inpatient interviews

**Authors:** Theodore Long, MD;<sup>1,2</sup> Inginia Genao, MD;<sup>2,3</sup> Leora I. Horwitz, MD, MHS<sup>2,4,3</sup>

**Running Title:** High-Risk Readmissions

**Author affiliations:**

<sup>1</sup>Internal Medicine Residency Program, Department of Internal Medicine, Yale School of Medicine, New Haven, CT

<sup>2</sup>[The Robert Wood Johnson Foundation Clinical Scholars Program, Yale School of Medicine, New Haven, CT,](#)

<sup>3</sup>Section of General Internal Medicine, Department of Internal Medicine, Yale School of Medicine, New Haven, CT

<sup>4</sup>Center for Outcomes Research and Evaluation, Yale-New Haven Hospital, New Haven, CT

Corresponding author:  
Theodore Long, MD

[Robert Wood Johnson Clinical Scholars Program](#)

[333 Cedar Street](#)

[SHM IE-61](#)

[PO Box 208088](#)

[New Haven, CT 06520](#)

[Tel: 203.785.4148](#)

[Fax: 203.785.3461](#) ~~Yale Traditional Internal Medicine Residency Training Program~~

[PO Box 208030](#)

[New Haven, CT 06520-8030](#)

[Tel: \(203\) 785-4123](#)

[Fax: \(203\) 785-7258](#)

[theodore.long@yale.edu](mailto:theodore.long@yale.edu)

**Formatted:** Font color: Black, Pattern: Clear (White)

**Formatted:** Font: (Default) Times New Roman, 12 pt, Not Bold

**Formatted:** Font: (Default) Times New Roman, 12 pt, Not Bold

Word count: ~~3498~~3347

Tables: ~~4~~

Figures: 0

References: ~~2~~86

1  
2  
3  
4  
5  
6  
7  
8  
9  
10  
11  
12  
13  
14  
15  
16  
17  
18  
19  
20  
21  
22  
23  
24  
25  
26  
27  
28  
29  
30  
31  
32  
33  
34  
35  
36  
37  
38  
39  
40  
41  
42  
43  
44  
45  
46  
47  
48  
49  
50  
51  
52  
53  
54  
55  
56  
57  
58  
59  
60

Word count (abstract): 214

Key words: access to care, care transitions, underserved populations, qualitative research, primary care

For peer review only

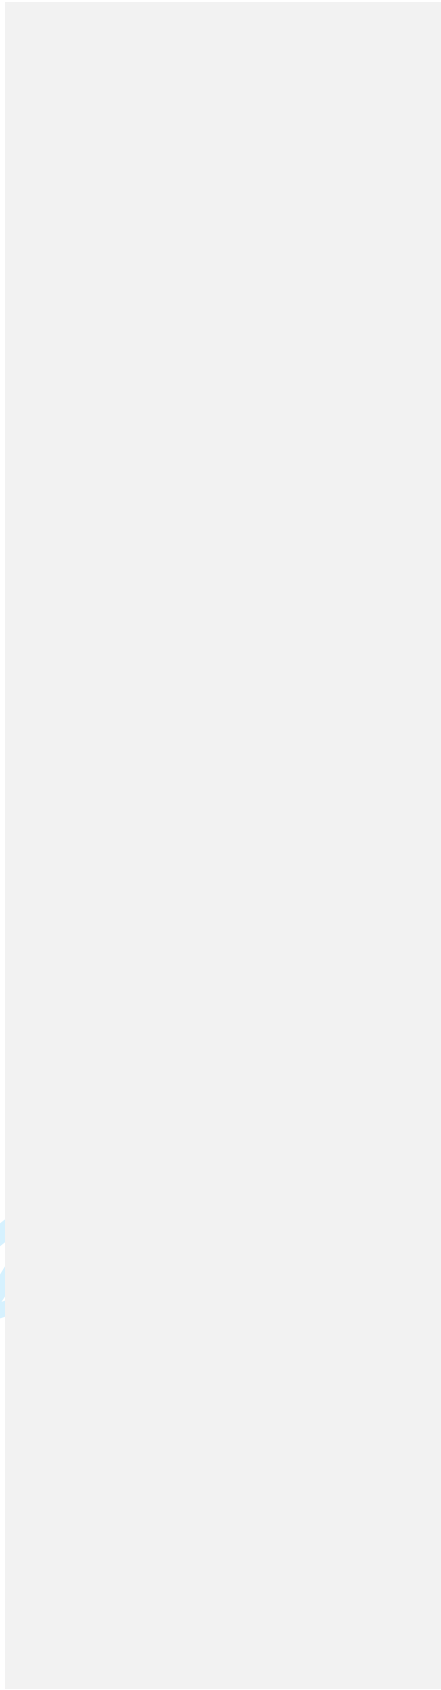

**Abstract**

Objective: To gather qualitative data to elucidate the reasons for readmissions in a high-risk population of underserved patients.

Design: We created an instrument with 27 open-ended questions based on current interventions.

Setting: Yale-New Haven Hospital.

Patients: Patients at the Yale Adult Primary Care Center (PCC).

Measurements: We conducted semi-structured qualitative interviews of patients who had four or more admissions in the previous six months and were currently readmitted to the hospital.

Results: We completed 17 interviews and identified themes relating to risk of readmission. We found that patients went directly to the Emergency Department (ED) when they experienced a change in health status without contacting their primary provider. Reasons for this included poor telephone or urgent care access and the belief that the PCC could not treat acute illness. Many patients could not name their primary provider. Conversely, every patient except one reported being able to obtain medications without undue financial burden, and every patient reported receiving adequate home care services.

Conclusions: These high-risk patients were receiving the formal services that they needed, but were making the decision to go to the ED because of inadequate access to care and fragmented primary care relationships. Formal transitional care services are unlikely to be adequate in reducing readmissions without also addressing primary care access and continuity.

1  
2  
3  
4  
5  
6  
7  
8  
9  
10  
11  
12  
13  
14  
15  
16  
17  
18  
19  
20  
21  
22  
23  
24  
25  
26  
27  
28  
29  
30  
31  
32  
33  
34  
35  
36  
37  
38  
39  
40  
41  
42  
43  
44  
45  
46  
47  
48  
49  
50  
51  
52  
53  
54  
55  
56  
57  
58  
59  
60

## Article Summary

### Article Focus:

- We asked the question of what unique factors [in the post-discharge experience for patients](#) were contributing to readmissions in a high-risk urban underserved population
- We explored patient perceptions of areas of current interventions, including home services, medications, and transportation
- We propose interventions based on our findings, and compare our results to other studies looking at readmissions

### Key Messages:

- We found that there are factors contributing to readmissions that are not addressed by current intervention strategies
- In our high-risk population, there was a lack of primary care relationship and a tendency to delay seeking care that resulted in patients triaging themselves to the Emergency Department

### Strengths and Limitations of this Study:

- Limitations include this being a single site study with a focus on patients at the highest risk of readmission; thus findings may not be comparable to other populations
- Strengths include elucidating the perspectives of an underrepresented population of patients and defining key areas for intervention in this population

## Introduction

Hospital readmissions represent a significant cost to the healthcare system and are a burden to patients. Nationally, 19.6% of Medicare beneficiaries discharged from the hospital are readmitted within 30 days and 34.0% are readmitted within 90 days [1]. Many attempts have been made to identify and address the issues leading to readmission. However, no single strategy has been found to reproducibly reduce readmissions [2]. Most studies evaluating this problem have focused on chart review and administrative data, but there is a paucity of qualitative information from the perspectives of patients [3]. It has been unclear what happens to patients once they are discharged from the hospital, and whether their health care outside of the hospital could be improved in order to prevent hospital readmissions.

This study examined patient experiences after hospital discharge by conducting qualitative interviews of high-risk patients during readmission. We studied the urban underserved population of patients at Yale-New Haven Hospital (YNHH) with the highest incidence of readmission. We chose to assess this population because the urban underserved comprise a disproportionate share of readmissions at many academic medical centers [4-7]. Furthermore, patients with low socioeconomic status have been shown to have a distinctly challenging experience transitioning from inpatient admission to home [8-10].

We sought to understand the perspectives of underserved patients at the highest risk of readmission in order to determine how future interventions could be more effective for this population. We examined their transition of care from the hospital to home, focusing on how they interacted with the health system once they left the hospital and what factors drove them to be readmitted so frequently.

## Methods

### *Setting*

We focused our study on the underserved population at YNHH, a 966 bed urban academic medical center. We interviewed patients cared for at the Yale Adult Primary Care Center (PCC), which is a hospital-based clinic serving primarily the low-income residents of New Haven. The PCC is staffed by internal medicine residents who are typically present for one half day per week as well as part and full time attending providers. Residents are assigned to the PCC for their entire three years of training.

### *Study Cohort*

Our study population was comprised of PCC patients with four or more admissions in the past six months, which is one of YNHH's criteria for high risk. At the time of this study, less than 150 patients at YNHH met this high-risk criterion, and of these 25% were PCC patients. We arranged for our medical record system to send a daily email listing all patients designated as high-risk currently admitted at YNHH. The criteria for this designation are either four or more admissions in the past six months or a diagnosis of heart failure. From the daily list, we identified patients who had four or more admissions in the past six months and who had an established primary care provider in the PCC as well as at least two completed clinic notes from the prior 12 months. We set out the requirement for at least two clinic notes to ensure that enrolled patients were actively followed by the PCC. We then restricted this group to patients who were currently readmitted within 30 days of their last date of discharge from YNHH. All interviews were conducted inpatient during the patients' readmission stays. We completed the study from October, 2011 to April, 2012. Interviews were completed on both weekdays and weekends. Twenty-one eligible patients were ~~identified~~ approached during the study period, and

1  
2  
3  
4  
5  
6  
7  
8  
9 four declined.

### 10 11 *Design*

12 We created an instrument with 27 open-ended questions based on areas targeted by  
13 current interventions as well as other qualitative studies looking at readmissions [3 11]. Given  
14 that most interventions are focused on supporting the patient in the post-discharge period, we  
15 focused our study on understanding the patient experience of several key support domains:  
16 social/emotional support (from friends, family, and clinicians), instrumental health system  
17 support (medications, transportation, access to outpatient care), and informational support  
18 (knowledge and self-efficacy) [12]. We then conducted pilot interviews and solicited feedback  
19 about the interview questions from patients. The instrument was revised based on this feedback.  
20 We also extensively reviewed the first complete interview transcription, and further revised the  
21 instrument based on this feedback as well. The final questions in the instrument included the  
22 areas of transportation, support systems, medications, formal services, health literacy, access to  
23 care, relationship with provider, communication with providers, and transitions of care (see  
24 Appendix 1 for list of questions). For questions asking for an affirmative/negative or numerical  
25 response, we used a strategy of planned prompts and probes to extend the narrative. We also  
26 included screening for depression via the Patient Health Questionnaire-2 (PHQ-2) [13] and for  
27 unhealthy alcohol use via the National Institute on Alcohol Abuse and Alcoholism (NIAAA)  
28 recommended tool [14]. The IRB waived the written consent requirement due to the fact that no  
29 identifying information was used. Informed consent was obtained verbally from all study  
30 participants. One investigator (T.L.) conducted semi-structured interviews. The interviews were  
31 recorded and then transcribed by a subcontracted transcriber.

### 32 33 34 35 36 37 38 39 40 41 42 43 44 45 46 47 48 49 50 *Analysis*

1  
2  
3  
4  
5  
6  
7  
8  
9 Three investigators (T.L., I.G., L.H.) independently generated codes from the primary  
10 transcriptions. The codes represented themes found in the data. The investigators initially coded  
11 the first four transcriptions independently and then reviewed the coding scheme and resolved  
12 discrepancies collaboratively. The transcriptions were saved as Microsoft Word documents, with  
13 codes being tracked as Comments within these documents. This process was repeated two more  
14 times, with all transcriptions being coded independently and then meeting to come to a group  
15 consensus. It was decided ahead of time that transcriptions would be coded until theoretical  
16 saturation was reached and no new codes were being introduced in the interviews. A final code  
17 list was developed using the constant comparative method [15]. The codes were organized into  
18 11 main themes.  
19  
20  
21  
22  
23  
24  
25  
26  
27  
28  
29

## 30 Results

31 ~~We completed 17 interviews (11 women, 6 men). On average, the interviews were 15 to~~  
32 ~~20 minutes long. Every patient except one screened negative for unhealthy alcohol use per the~~  
33 ~~NIAAA tool and 47% had a positive screen for depression per the PHQ-2.~~

34 ~~Thirty-six patients met inclusion criteria at the onset of the study. Of the 36 patients, 21~~  
35 ~~eligible patients were approached, and four declined. We completed 17 interviews (11 women, 6~~  
36 ~~men). On average, the interviews were 15 to 20 minutes long. For the overall cohort of 36~~  
37 ~~patients meeting inclusion criteria, patient characteristics are provided in Table 1. When patients~~  
38 ~~presented to the ED, 67% of the time they were admitted to the hospital (see Table 2 for hospital~~  
39 ~~admission and ED diagnoses). Patients also had multiple visits to the PCC and the ED (Table 3).~~  
40 ~~Sixteen of the 17 patients we interviewed screened negative for unhealthy alcohol use per the~~  
41 ~~NIAAA tool and 47% had a positive screen for depression per the PHQ-2.~~

Formatted: Font: (Default) Times New Roman, 12 pt, Font color: Custom Color(RGB(34,34,34))

Formatted: Normal, Indent: Left: 0", First line: 0.5", Line spacing: Double

Formatted: Font: (Default) Times New Roman, 12 pt

Formatted: Font: (Default) Times New Roman, 12 pt, Font color: Custom Color(RGB(34,34,34))

Formatted: Font color: Custom Color(RGB(34,34,34))



**Table 1:** Patient Characteristics for Cohort Meeting Inclusion Criteria (N=36)

| <u>Age</u>                   | <u>Number (%)</u> |
|------------------------------|-------------------|
| <u>19 to 39</u>              | <u>10 (28)</u>    |
| <u>40 to 64</u>              | <u>18 (50)</u>    |
| <u>65 or above</u>           | <u>8 (22)</u>     |
| <u>Race/Ethnicity</u>        |                   |
| <u>Hispanic</u>              | <u>8 (22)</u>     |
| <u>Black</u>                 | <u>16 (44)</u>    |
| <u>White</u>                 | <u>11 (31)</u>    |
| <u>Other</u>                 | <u>1 (3)</u>      |
| <u>Insurance Status</u>      |                   |
| <u>Medicaid only</u>         | <u>15 (42)</u>    |
| <u>Medicare only</u>         | <u>1 (3)</u>      |
| <u>Medicaid and Medicare</u> | <u>16 (44)</u>    |
| <u>Self-pay</u>              | <u>1 (3)</u>      |
| <u>Other</u>                 | <u>3 (8)</u>      |

**Table 2:** Most Common Diagnoses for ED Visits and Hospital Admissions in 2011

| <u>ED Visit Diagnosis</u>                   | <u>Hospital Admission Diagnosis</u>         |
|---------------------------------------------|---------------------------------------------|
| <u>Abdominal pain (16%)</u>                 | <u>Abdominal pain (12%)</u>                 |
| <u>Chest pain (9%)</u>                      | <u>Nausea/Vomiting, Abdominal pain (9%)</u> |
| <u>Nausea/Vomiting, Abdominal pain (9%)</u> | <u>COPD exacerbation (8%)</u>               |
| <u>COPD exacerbation (5%)</u>               | <u>Shortness of breath (6%)</u>             |
| <u>GI bleed (4%)</u>                        | <u>Congestive heart failure (6%)</u>        |
| <u>Other (43%)</u>                          | <u>Other (59%)</u>                          |

**Table 3:** PCC and ED Utilization

| <u>Primary Care and ED Characteristics</u>                | <u>N=36</u>    |
|-----------------------------------------------------------|----------------|
| <u>Medications, mean</u>                                  | <u>12.0</u>    |
| <u>Polypharmacy (&gt;6 medications), n (%)</u>            | <u>30 (83)</u> |
| <u>Number of patient diagnoses (comorbidity), mean</u>    | <u>7.1</u>     |
| <u>ED visits in 2011, mean</u>                            | <u>6.6</u>     |
| <u>Number of follow-up appointments made with PCC</u>     | <u>66</u>      |
| <u>Number of follow-up appointments kept</u>              | <u>29</u>      |
| <u>Number of patients using behavioral health, n (%)</u>  | <u>5 (14)</u>  |
| <u>Average number of PCC visits in the last 12 months</u> | <u>4.3</u>     |

We identified 11 themes (Table 44), and describe five relating to risk of readmission:

Formatted: Indent: First line: 0.5"

1  
2  
3  
4  
5  
6  
7  
8  
9 fragmented primary care relationships contributing to avoidance of ambulatory care, self triage  
10 leading to potentially avoidable ED use, adequacy of formal services, heavy reliance on informal  
11 support systems, and inadequate access to care. The codes contributing to these five themes were  
12  
13 consistent throughout the interviews and pertained to either reasons for readmission or current  
14  
15 interventions targeted at decreasing readmissions. The other themes represented self-reported  
16  
17 descriptions, such as substance abuse for the theme of patient characteristics. Overall, we found  
18  
19 that while patients described receiving adequate formal services, barriers in accessing care and  
20  
21 disjointed primary care relationships led to patients making their own triage decisions and  
22  
23 seeking other support systems.  
24

25  
26 **Table 4:** 11 Main Themes

|                                  |                                                                                    |
|----------------------------------|------------------------------------------------------------------------------------|
| 27<br>28<br>29<br>30             | Heavy Reliance on Informal Support Systems                                         |
| 31<br>32                         | Adequacy of Formal Services                                                        |
| 33<br>34                         | Health Literacy                                                                    |
| 35<br>36                         | Inadequate Access to Care                                                          |
| 37<br>38<br>39<br>40<br>41<br>42 | Fragmented Primary Care Relationships Contributing to Avoidance of Ambulatory Care |
| 43<br>44<br>45                   | Self Triage Leading to Potentially Avoidable ED Use                                |
| 46<br>47                         | Patient Phone Call                                                                 |
| 48<br>49                         | Discharge Planning                                                                 |
| 50<br>51<br>52                   | Patient Characteristics                                                            |

1  
2  
3  
4  
5  
6  
7  
8  
9  
10  
11  
12  
13  
14  
15  
16  
17  
18  
19  
20  
21  
22  
23  
24  
25  
26  
27  
28  
29  
30  
31  
32  
33  
34  
35  
36  
37  
38  
39  
40  
41  
42  
43  
44  
45  
46  
47  
48  
49  
50  
51  
52  
53  
54  
55  
56  
57  
58  
59  
60

|                                            |
|--------------------------------------------|
| Readmissions (same or different complaint) |
| Post-Discharge Course                      |

### *Fragmented Primary Care Relationships Contributing to Avoidance of Ambulatory Care*

Participants described a fragmented relationship with their providers. Nine patients were able to name their primary provider, while seven patients were unable to. In terms of their connection with their provider, many expressed concern: “I ain’t got no relationship. I don’t even know the person. They don’t even know me. There was no relationship.”

Patients further referred to provider turnover and large provider teams as deleterious to developing a relationship with their providers. One patient explained: “Well, I hate that they keep switching doctors. They can’t really keep the same doctor because as soon as you get comfortable with one person they’ll let you know somebody else is there. Now it’s like you got to learn this person all over. I hate changing doctors. I don’t like that.” Another patient described improving the relationship with her primary provider, stating “It [would] make me feel better knowing that somebody cares [...] They could give advice on the phone telling me what I should do. And I could do that to prevent going to the hospital because I’m in the hospital a lot.”

### *Self Triage Leading to Potentially Avoidable ED Use*

We found that patients were typically going directly to the Emergency Department (ED) without contacting their primary care provider: “I could tell the pain, if it is severe enough to go to the PCC and sit around to be called in the clinic or do I need to just get out there and go right to the emergency room. So I could tell the difference, I learned to know my body now after getting so sick and the last three years I’ve been very sick.”

Patients commonly cited inability to reach their primary provider via telephone and the

1  
2  
3  
4  
5  
6  
7  
8  
9 belief that the PCC could not treat acute illness as reasons for going directly to the ED. One  
10 patient explained that “I know that once I get there [to the PCC], they would send me anyway so  
11 I might just as well go to the [ED] first.”  
12

13  
14 Finally, amongst patients who decided to go to the ED instead of going for an urgent  
15 primary care visit, a common theme was delaying action until the situation became more serious.  
16 One patient commented “I wait[ed] instead to get better [...] my head was pounding and when I  
17 walked to the bathroom I'd be staggering [...] I mashed my lifeline, and the ambulance picked  
18 me up.”  
19  
20  
21  
22  
23

#### 24 *Adequacy of Formal Services*

25  
26 We found that patients had limited or no difficulty accessing formal services such as  
27 medication assistance, home care, and transportation. All patients except one were able to obtain  
28 medications either despite financial barriers or with no financial barriers. One patient noted “I  
29 got medical and they basically pay for [medications].” Patients similarly found home care  
30 accessible, describing “Well, I have a nurse coming usually once a week and more often if there  
31 is something going on.” Formal transportation was obtained with minimal difficulty, with one  
32 patient explaining “They have a car that gets me [...] I have to call and make an appointment and  
33 they would call people telling them two days in advance.”  
34  
35  
36  
37  
38  
39

#### 40 *Heavy Reliance on Informal Support Systems*

41  
42 Despite the widespread availability and use of formal post-discharge support systems,  
43 patients reported still relying heavily on informal support from friends and family members to  
44 help with transportation and medication management. One patient described “So my daughter  
45 sets them out now so it makes it easier for the visit nurse, so that's how I manage my medication  
46 at home. They put it in a little blue container and my daughter sets them up by the week.”  
47  
48  
49  
50  
51  
52

1  
2  
3  
4  
5  
6  
7  
8  
9 Another patient commented “If I can’t move, my family give me a ride - my daughter, my man,  
10 my niece, my nephew, my son.” Patients demonstrated resilient attitudes based on the high  
11 degree of support they received from friends and family members, and notably described that  
12 they did not feel lonely or socially isolated despite spending a great deal of time in the hospital.  
13  
14  
15

16 Patients also reported feeling safe at home.

### 17 *Inadequate Access to Care*

18  
19  
20 The most commonly cited problem inhibiting patients from accessing medical care was  
21 an impaired ability to speak to their provider on the telephone. This was described as both  
22 difficulty in reaching someone on the phone as well as long waiting times before receiving a call  
23 back from a provider. As one patient noted, “I don’t call primary care because it takes too long to  
24 get through to anybody until you get the call – I could have gone on a trip to Europe and back.”  
25  
26  
27  
28

29 Patients also noted that they had stopped even trying to call based on prior experiences:  
30  
31 “I try to call the Primary Care Center. But it’s like that one time that took 7 hours. I haven’t  
32 called them [since]. So it’s like either I stick it out and let the pain or whatever subside, or I go  
33 down to the ER. If I called them one time and it took them some hours to get back to me, I feel  
34 that it’s useless if I call again.”  
35  
36  
37  
38

### 39 **Discussion**

40  
41 In this study of underserved patients with a high frequency of hospital readmissions, we  
42 found that there may be factors contributing to readmissions that are not addressed by most  
43 current interventions, which typically target access to formal outpatient services [3 16 17].  
44  
45  
46 Contrary to our expectations, patients from our sample did not have difficulty accessing  
47 medications, home care, or transportation. Rather, the primary factors contributing to  
48 readmissions that were consistently brought up by patients in our study were self triage to the ED  
49  
50  
51  
52  
53  
54  
55  
56  
57  
58  
59  
60

1  
2  
3  
4  
5  
6  
7  
8  
9 and a lack of primary care relationship.

10 While other studies have examined the challenges in transitions from inpatient care [8  
11 18], we explored how patients interacted with the health system when they were home. We  
12 found that patients delayed care and then made the decision to go to the ED without attempting  
13 to contact their primary providers. Delays in care may have increased risk for readmission. This  
14 delay of care likely resulted in a worsening of their health status which consequently precipitated  
15 another hospital admission. The most consistent reasons for not reaching out to their primary  
16 providers were inability to speak with a provider on the phone, the belief that their primary care  
17 provider could not manage urgent issues, and patient perception that their primary care provider  
18 could not address their concerns in a timely manner.  
19  
20  
21  
22  
23  
24  
25  
26  
27

28 Our results differ from other qualitative studies evaluating readmissions. In a recent  
29 article by Strunin et al (2007), patients expressed that they had inadequate medical care at home  
30 and lacked transportation to appointments [3]. In contrast, we found that these needs were being  
31 met for our high-risk patients. Similarly, a recent survey by Kangovi et al (2012) of patients that  
32 had been readmitted found that lack of medication adherence after discharge was commonly  
33 attributed to difficulty paying for medications and obtaining transportation [8]. In our sample of  
34 patients, only one patient reported not being able to obtain medications due to cost. Although  
35 other studies have included patients with one or more readmission within 30 days of discharge,  
36 we utilized more stringent enrollment criteria, requiring patients to have had four or more  
37 admissions in the prior six months. The high-risk underserved patients that we enrolled may have  
38 had more interaction with the hospital system than other patients with fewer hospital admissions,  
39 and therefore may have had more opportunity to be linked in with formal services such as  
40 medication assistance, visiting nurse services, and transportation arranged through the hospital.  
41  
42  
43  
44  
45  
46  
47  
48  
49  
50  
51  
52

1  
2  
3  
4  
5  
6  
7  
8  
9 However, future studies will be needed to determine if there is indeed a direct association  
10 between increased interaction with the hospital system and increased formal services compared  
11 to other patient populations.

12  
13  
14 ~~The high-risk underserved patients that we enrolled likely had more interaction with the health~~  
15 ~~system than other patients with fewer hospital admissions, and therefore may have had more~~  
16 ~~opportunity to be linked in with formal services such as VNA and arranged transportation.~~

17  
18  
19 ~~Q~~ Thus our findings suggest that this population of patients needs more targeted  
20  
21 interventions to address the consistently stated problems of self triage and a lack of primary care  
22 relationship. Another recent study by Kangovi et al (2013) described a social norm of high-risk  
23 patients preferring the hospital for care when they have a change in their health status [19]. They  
24 similarly conclude that targeted interventions should address the needs of high-risk patients in  
25 the ambulatory setting.

26  
27  
28  
29  
30  
31 First, ~~it is critical to have easy~~ improving telephone access to primary care offices is  
32 important, as many primary care patients prefer this method of communication, and it this is the  
33 preferred method of communication for patients and is linked to improved patient outcomes [20-  
34  
35  
36  
37  
38  
39  
40  
41  
42  
43  
44  
45  
46  
47  
48  
49  
50  
51  
52  
53  
54  
55  
56  
57  
58  
59  
60  
22]. An effective telephone system would triage urgent issues, and would ensure that a member  
of the patient's provider team is available to field urgent calls. Patients in our study commonly  
mentioned that they wanted to receive a timely call back for urgent issues. Open access  
scheduling, which minimizes scheduled appointments to maximize same-day visit availability,  
typically also improves telephone access by opening up the calendar and streamlining the types  
of appointments that can be made. The time taken per call is consequently shorter [23 24].

Alternatively, many new electronic medical record systems allow secure messaging through the  
electronic medical record, thereby reducing demand for telephone access, and facilitating timely

Formatted: Indent: First line: 0.5"

1  
2  
3  
4  
5  
6  
7  
8  
9 responses to urgent calls [25 26]. Future research regarding the best modes of communication  
10 with providers will be an important area of inquiry moving forward.

11  
12 Second, many patients in our study had stopped calling their primary care provider  
13 because of their perceptions of the primary care clinic as incapable of handling acute medical  
14 concerns. Patient experiences, such as being transferred from their primary care office to the ED,  
15 shaped their perception of the primary care clinic. Once access to providers has been improved  
16 and the lack of primary care relationship has been repaired, we would suggest educating patients  
17 about the scope of their primary care clinics as urgent care centers, as well as the role of their  
18 primary providers in their care when they have a change in their health status. In addition,  
19 providers should discuss their role in helping patients make triage decisions when they get sick at  
20 home.  
21  
22  
23  
24  
25  
26  
27  
28

29 Third, patients in our study described inadequate continuity with their providers. Patient-  
30 provider continuity ~~is essential and~~ has been consistently associated with improved patient  
31 outcomes and satisfaction [27 28]. To address the lack of primary care relationship that patients  
32 described, there must first be a system in place that enables patients to have continuity with their  
33 teams when they have a change in their health status [10]. This is especially difficult in clinics  
34 staffed by residents who are present one half day per week, which is a common model for  
35 internal medicine residency programs. When patients have urgent issues that arise, they are often  
36 seen by providers who are not part of their primary care team. A strategy for improving upon this  
37 situation would be to arrange residents into practice-partner teams where they would work  
38 together to care for a larger panel of patients. While the patients would still need to become  
39 familiar with a team of resident physicians, this has the potential to make patients feel more  
40 comfortable seeking care for acute issues. This team-based care would also aid in the conversion  
41  
42  
43  
44  
45  
46  
47  
48  
49  
50  
51  
52



1  
2  
3  
4  
5  
6  
7  
8  
9 of primary care clinics to patient-centered medical homes, where continuity is an essential tenet.

10  
11 Our study has several limitations. First, we focused on an underserved population; our  
12 results may not apply to other populations. Second, our sample size is small, though we did  
13 employ a comprehensive strategy to identify patients meeting our enrollment criteria during the  
14 study period, and we did reach theoretical saturation as evidenced by no new themes being  
15 introduced in the final interviews. Third, we conducted our study at a single site, and there may  
16 be other factors more prevalent at other sites contributing to readmission.  
17  
18  
19  
20  
21

22 In summary, we found that even though patients were receiving the formal services that  
23 they needed, they were still being driven to make the decision to go to the ED based on based on  
24 long phone wait times for primary care and their belief or experience that primary care cannot  
25 treat their acute problems. We propose that educating patients about the capability and role of the  
26 primary care provider while concurrently streamlining telephone access to providers could  
27 enhance continuity and thereby prevent readmissions. Focusing entirely on arranging formal  
28 transitional care services, such as transportation and medications, is unlikely to be adequate in  
29 reducing readmissions.  
30  
31  
32  
33  
34  
35  
36  
37  
38  
39  
40  
41  
42  
43  
44  
45  
46  
47  
48  
49  
50  
51  
52  
53  
54  
55  
56  
57  
58  
59  
60

## Acknowledgements

*Funders:* Dr. Horwitz is supported by the National Institute on Aging (K08 AG038336) and by the American Federation for Aging Research through the Paul B. Beeson Career Development Award Program. This work was also supported by a grant from the Claude D. Pepper Older Americans Independence Center at Yale University School of Medicine (P30AG021342 NIH/NIA). No funding source had any role in the study design; in the collection, analysis, and interpretation of data; in the writing of the report; or in the decision to submit the article for publication. The content is solely the responsibility of the authors and does not necessarily represent the official views of the National Institute on Aging, the National Institutes of Health, or the American Federation for Aging Research.

*Access to data:* Leora Horwitz had full access to all of the data in the study and takes responsibility for the integrity of the data and the accuracy of the data analysis.

*Prior presentations:* An earlier version of this work was presented as an oral presentation at the Society of General Internal Medicine Annual Meeting in Orlando, FL on May 12, 2012.

*Conflicts of interest:* The authors have no conflicts of interest to report.

## References

1. Jencks SF, Williams MV, Coleman EA. Rehospitalizations among patients in the Medicare fee-for-service program. *The New England journal of medicine* 2009;**360**(14):1418-28 doi: 10.1056/NEJMsa0803563[published Online First: Epub Date]].
2. Hansen LO, Young RS, Hinami K, et al. Interventions to reduce 30-day rehospitalization: a systematic review. *Annals of internal medicine* 2011;**155**(8):520-8 doi: 10.1059/0003-4819-155-8-201110180-00008[published Online First: Epub Date]].
3. Strunin L, Stone M, Jack B. Understanding rehospitalization risk: can hospital discharge be modified to reduce recurrent hospitalization? *J Hosp Med* 2007;**2**(5):297-304
4. Weissman JS, Stern RS, Epstein AM. The impact of patient socioeconomic status and other social factors on readmission: a prospective study in four Massachusetts hospitals. *Inquiry : a journal of medical care organization, provision and financing* 1994;**31**(2):163-72
5. Billings J, Zeitel L, Lukomnik J, et al. Impact of socioeconomic status on hospital use in New York City. *Health affairs (Project Hope)* 1993;**12**(1):162-73
6. Kalra AD, Fisher RS, Axelrod P. Decreased length of stay and cumulative hospitalized days despite increased patient admissions and readmissions in an area of urban poverty. *Journal of general internal medicine* 2010;**25**(9):930-5 doi: 10.1007/s11606-010-1370-5[published Online First: Epub Date]].
7. Allaudeen N, Vidyarthi A, Maselli J, et al. Redefining readmission risk factors for general medicine patients. *Journal of hospital medicine : an official publication of the Society of Hospital Medicine* 2011;**6**(2):54-60 doi: 10.1002/jhm.805[published Online First: Epub Date]].
8. Kangovi S, Grande D, Meehan P, et al. Perceptions of readmitted patients on the transition from hospital to home. *Journal of hospital medicine : an official publication of the Society of Hospital Medicine* 2012;**7**(9):709-12 doi: 10.1002/jhm.1966[published Online First: Epub Date]].
9. Raven MC, Billings JC, Goldfrank LR, Manheimer ED, Gourevitch MN. Medicaid patients at high risk for frequent hospital admission: real-time identification and remediable risks. *Journal of urban health : bulletin of the New York Academy of Medicine* 2009;**86**(2):230-41 doi: 10.1007/s11524-008-9336-1[published Online First: Epub Date]].
10. Englander H, Kansagara D. Planning and designing the care transitions innovation (C-Train) for uninsured and Medicaid patients. *Journal of hospital medicine : an official publication of the Society of Hospital Medicine* 2012;**7**(7):524-9 doi: 10.1002/jhm.1926[published Online First: Epub Date]].
11. Annema C, Luttik ML, Jaarsma T. Reasons for readmission in heart failure: Perspectives of patients, caregivers, cardiologists, and heart failure nurses. *Heart & lung : the journal of critical care* 2009;**38**(5):427-34 doi: 10.1016/j.hrtlng.2008.12.002[published Online First: Epub Date]].
12. Cohen S, Wills TA. Stress, social support, and the buffering hypothesis. *Psychological bulletin* 1985;**98**(2):310-57
13. Kroenke K, Spitzer RL, Williams JB. The Patient Health Questionnaire-2: validity of a two-item depression screener. *Medical care* 2003;**41**(11):1284-92 doi: 10.1097/01.mlr.0000093487.78664.3c[published Online First: Epub Date]].
14. Smith PC, Schmidt SM, Allensworth-Davies D, et al. Primary care validation of a single-question alcohol screening test. *Journal of general internal medicine* 2009;**24**(7):783-8 doi: 10.1007/s11606-009-0928-6[published Online First: Epub Date]].
15. Glaser BG, Strauss AL. *The Discovery of Grounded Theory: Strategies for Qualitative Research*. New York: Aldine, 1967.
16. Boling PA. Care transitions and home health care. *Clinics in geriatric medicine* 2009;**25**(1):135-48, viii doi: 10.1016/j.cger.2008.11.005[published Online First: Epub Date]].

1  
2  
3  
4  
5  
6  
7  
8  
9  
10  
11  
12  
13  
14  
15  
16  
17  
18  
19  
20  
21  
22  
23  
24  
25  
26  
27  
28  
29  
30  
31  
32  
33  
34  
35  
36  
37  
38  
39  
40  
41  
42  
43  
44  
45  
46  
47  
48  
49  
50  
51  
52  
53  
54  
55  
56  
57  
58  
59  
60

17. Pearson S, Inglis SC, McLennan SN, et al. Prolonged effects of a home-based intervention in patients with chronic illness. *Archives of internal medicine* 2006;**166**(6):645-50 doi: 10.1001/archinte.166.6.645[published Online First: Epub Date]].
18. Davis MM, Devoe M, Kansagara D, Nicolaidis C, Englander H. "Did I do as best as the system would let me?" Healthcare professional views on hospital to home care transitions. *Journal of general internal medicine* 2012;**27**(12):1649-56 doi: 10.1007/s11606-012-2169-3[published Online First: Epub Date]].
19. Kangovi S, Barg FK, Carter T, Long JA, Shannon R, Grande D. Understanding why patients of low socioeconomic status prefer hospitals over ambulatory care. *Health affairs* 2013;**32**(7):1196-203 doi: 10.1377/hlthaff.2012.0825[published Online First: Epub Date]].
20. LaVela SL, Schectman G, Gering J, et al. Understanding health care communication preferences of veteran primary care users. *Patient education and counseling* 2012;**88**(3):420-6 doi: 10.1016/j.pec.2012.06.004[published Online First: Epub Date]].
21. Wasson J, Gaudette C, Whaley F, et al. Telephone care as a substitute for routine clinic follow-up. *JAMA : the journal of the American Medical Association* 1992;**267**(13):1788-93
22. Curry SJ, McBride C, Grothaus LC, et al. A randomized trial of self-help materials, personalized feedback, and telephone counseling with nonvolunteer smokers. *Journal of consulting and clinical psychology* 1995;**63**(6):1005-14
23. Steinbauer JR, Korell K, Erdin J, et al. Implementing open-access scheduling in an academic practice. *Family practice management* 2006;**13**(3):59-64
24. Rose KD, Ross JS, Horwitz LI. Advanced access scheduling outcomes: a systematic review. *Arch Intern Med* 2011;**171**(13):1150-9 doi: 10.1001/archinternmed.2011.168[published Online First: Epub Date]].
25. Zhou YY, Garrido T, Chin HL, et al. Patient access to an electronic health record with secure messaging: impact on primary care utilization. *The American journal of managed care* 2007;**13**(7):418-24
26. Coleman EA. Falling through the cracks: challenges and opportunities for improving transitional care for persons with continuous complex care needs. *Journal of the American Geriatrics Society* 2003;**51**(4):549-55
27. Wasson JH, Sauvigne AE, Mogielnicki RP, et al. Continuity of outpatient medical care in elderly men. A randomized trial. *JAMA : the journal of the American Medical Association* 1984;**252**(17):2413-7
28. van Walraven C, Oake N, Jennings A, et al. The association between continuity of care and outcomes: a systematic and critical review. *Journal of evaluation in clinical practice* 2010;**16**(5):947-56 doi: 10.1111/j.1365-2753.2009.01235.x[published Online First: Epub Date]].

1  
2  
3  
4  
5  
6  
7  
8  
9  
10  
11  
12 **Appendix 1:** List of questions from interview instrument

13 Tell me what happened to you since you went home between last discharge and now?

14  
15 Do you think there is anything else that could have been done to have prevented you from  
16 coming back to hospital, and if so what?  
17

18 When you have a change in your health at home, or start to feel sick at home, how do you make  
19 the decision to try to reach your PMD versus going to the ED?  
20

21 How often do you try to reach your PMD as opposed to going to the ED?  
22

23 When you have a change in your health at home, or start to feel sick at home, how long have you  
24 waited in the past before contacting your provider?  
25

26 Can you tell me about the medications you take at home?  
27

28 Has a financial barrier or problem ever resulted in you not being able to obtain the medications  
29 that you need? If so, tell me about it. Has this been a common problem for you?  
30

31 How do you manage your medications at home?  
32

33 Do you have any difficulty with your medications?  
34

35 Tell me what it's like at home for you?  
36

37 Do you have people who can help you at home?  
38

39 Do you feel safe at home?  
40

41 How do you think of the social support you have at home?  
42

43 What is your financial situation?  
44

45 In what ways do you have difficulty getting to and from your primary care appointments, if at  
46 all?  
47

48 How do you get around?  
49

50 In the last couple of weeks, have you been feeling depressed?  
51

52 Have you ever been on any medications for depression?  
53  
54  
55  
56  
57  
58  
59  
60

1  
2  
3  
4  
5  
6  
7  
8  
9  
10  
11  
12  
13  
14  
15  
16  
17  
18  
19  
20  
21  
22  
23  
24  
25  
26  
27  
28  
29  
30  
31  
32  
33  
34  
35  
36  
37  
38  
39  
40  
41  
42  
43  
44  
45  
46  
47  
48  
49  
50  
51  
52  
53  
54  
55  
56  
57  
58  
59  
60

Do you feel like these feelings of depression have caused you to have to come to hospital more than you otherwise would have to?

What's your relationship with your primary doctor at the Primary Care Center?

Do you know the name of your PMD, and do you have difficulty reaching your primary doctor if you're having a problem?

How can your primary doctor help to prevent you from having to be readmitted to the hospital do you think?

Can you think of anything more your primary doctor, or the Primary Care Center here at Yale could do?

What do you think are some other things that can be done to help prevent you from having to come back to the hospital, if anything?

Is there anything else that you think that either you or the physicians in the community could do to help you with that?

Do you need any more home support (home nursing care, VNA, etc) than you currently are receiving?

Finally, do you think it would be helpful for your primary doctor to call you at home to check in with you on a regular basis, and why?

## Consolidated criteria for reporting qualitative studies (COREQ): 32-item checklist

| No                                             | Item                                     | Guide questions/description                                                                                                                                                                                                   |
|------------------------------------------------|------------------------------------------|-------------------------------------------------------------------------------------------------------------------------------------------------------------------------------------------------------------------------------|
| <b>Domain 1: Research team and reflexivity</b> |                                          |                                                                                                                                                                                                                               |
| Personal Characteristics                       |                                          |                                                                                                                                                                                                                               |
| 1.                                             | Interviewer/facilitator                  | Which author/s conducted the interview or focus group?<br>Theodore Long                                                                                                                                                       |
| 2.                                             | Credentials                              | What were the researcher's credentials? <i>E.g. PhD, MD</i><br>MD                                                                                                                                                             |
| 3.                                             | Occupation                               | What was their occupation at the time of the study?<br>Internal Medicine resident                                                                                                                                             |
| 4.                                             | Gender                                   | Was the researcher male or female?<br>Male                                                                                                                                                                                    |
| 5.                                             | Experience and training                  | What experience or training did the researcher have?<br>Researcher received training from both Dr. Horwitz, who has extensive experience with qualitative interviewing, as well as relevant textbooks on qualitative studies. |
| Relationship with participants                 |                                          |                                                                                                                                                                                                                               |
| 6.                                             | Relationship established                 | Was a relationship established prior to study commencement?<br>No                                                                                                                                                             |
| 7.                                             | Participant knowledge of the interviewer | What did the participants know about the researcher? <i>e.g. personal goals, reasons for doing the research</i><br>Participants knew that the researcher was conducting interviews for the purpose of this research study.    |
| 8.                                             | Interviewer characteristics              | What characteristics were reported about the interviewer/facilitator? <i>e.g. Bias, assumptions, reasons and interests in the research topic</i><br>Researcher stated interest in research topic.                             |
| <b>Domain 2: study design</b>                  |                                          |                                                                                                                                                                                                                               |
| Theoretical framework                          |                                          |                                                                                                                                                                                                                               |
| 9.                                             | Methodological orientation and Theory    | What methodological orientation was stated to underpin the study? <i>e.g. grounded theory, discourse analysis, ethnography, phenomenology, content analysis</i><br>Grounded theory                                            |
| Participant selection                          |                                          |                                                                                                                                                                                                                               |
| 10.                                            | Sampling                                 | How were participants selected? <i>e.g. purposive, convenience, consecutive, snowball</i><br>Purposive                                                                                                                        |
| 11.                                            | Method of approach                       | How were participants approached? <i>e.g. face-to-face, telephone, mail, email</i><br>Face-to-face                                                                                                                            |
| 12.                                            | Sample size                              | How many participants were in the study?<br>17                                                                                                                                                                                |
| 13.                                            | Non-participation                        | How many people refused to participate or dropped out? Reasons?<br>4 patients refused, stating that they were not interested in                                                                                               |

| No  | Item                                   | Guide questions/description                                                                                                                                                         |
|-----|----------------------------------------|-------------------------------------------------------------------------------------------------------------------------------------------------------------------------------------|
|     |                                        | participating                                                                                                                                                                       |
|     | Setting                                |                                                                                                                                                                                     |
| 14. | Setting of data collection             | Where was the data collected? e.g. <i>home, clinic, workplace</i><br>Workplace                                                                                                      |
| 15. | Presence of non-participants           | Was anyone else present besides the participants and researchers?<br>No                                                                                                             |
| 16. | Description of sample                  | What are the important characteristics of the sample? e.g. <i>demographic data, date</i><br>No identifying information was used, we only used status as a primary care patient      |
|     | Data collection                        |                                                                                                                                                                                     |
| 17. | Interview guide                        | Were questions, prompts, guides provided by the authors?<br>Was it pilot tested?<br>The interview guide was iterative and tested through evaluating interviews sequentially.        |
| 18. | Repeat interviews                      | Were repeat interviews carried out? If yes, how many?<br>No                                                                                                                         |
| 19. | Audio/visual recording                 | Did the research use audio or visual recording to collect the data?<br>We used an audio recording device                                                                            |
| 20. | Field notes                            | Were field notes made during and/or after the interview or focus group?<br>No                                                                                                       |
| 21. | Duration                               | What was the duration of the interviews or focus group?<br>15 to 20 minutes per interview                                                                                           |
| 22. | Data saturation                        | Was data saturation discussed?<br>Yes, we felt that we reached theoretical saturation                                                                                               |
| 23. | Transcripts returned                   | Were transcripts returned to participants for comment and/or correction?<br>No                                                                                                      |
|     | <b>Domain 3: analysis and findings</b> |                                                                                                                                                                                     |
|     | Data analysis                          |                                                                                                                                                                                     |
| 24. | Number of data coders                  | How many data coders coded the data?<br>Three                                                                                                                                       |
| 25. | Description of the coding tree         | Did authors provide a description of the coding tree?<br>Yes                                                                                                                        |
| 26. | Derivation of themes                   | Were themes identified in advance or derived from the data?<br>Derived from data                                                                                                    |
| 27. | Software                               | What software, if applicable, was used to manage the data?<br>None                                                                                                                  |
| 28. | Participant checking                   | Did participants provide feedback on the findings?<br>No                                                                                                                            |
|     | Reporting                              |                                                                                                                                                                                     |
| 29. | Quotations presented                   | Were participant quotations presented to illustrate the themes / findings? Was each quotation identified? e.g. <i>participant number</i><br>Quotations were used but not identified |
| 30. | Data and findings consistent           | Was there consistency between the data presented and the findings?                                                                                                                  |



| No  | Item                    | Guide questions/description                                                   |
|-----|-------------------------|-------------------------------------------------------------------------------|
|     |                         | Yes                                                                           |
| 31. | Clarity of major themes | Were major themes clearly presented in the findings?<br>Yes                   |
| 32. | Clarity of minor themes | Is there a description of diverse cases or discussion of minor themes?<br>Yes |

For peer review only
